# Supplementary material for: Biomarker analysis of the ASPEN study comparing zanubrutinib with ibrutinib for patients with Waldenström macroglobulinemia
Source: PubMed Central journal article supplement — Blood Adv. 2024 Feb 6;8(7):1639–50. doi: 10.1182/bloodadvances.2023010906 (PMC11006814; doi:10.1182/bloodadvances.2023010906), 2024-02-06

**SUPPLEMENTAL MATERIAL**

**Supplemental Table 1. List of genetic alterations found in baseline samples.**

| Patient ID | Gene   | Genetic alterations (depth, VAF)      | Treatment arm                                             |
|------------|--------|---------------------------------------|-----------------------------------------------------------|
| pts#1      | ARID1A | p.Y470*,c.1410T>A(8095,0.0504)        | patients with MYD88 <sup>MUT</sup> treated with ibrutinib |
| pts#2      | NBN    | p.S53Cfs*9,c.156_157del(5036,0.4565)  | patients with MYD88 <sup>MUT</sup> treated with ibrutinib |
| pts#3      | ARID1A | p.E2250Rfs*28,c.6747dup(7211,0.0062)  | patients with MYD88 <sup>MUT</sup> treated with ibrutinib |
| pts#3      | ATRX   | p.R2386*,c.7156C>T(2999,0.016)        | patients with MYD88 <sup>MUT</sup> treated with ibrutinib |
| pts#3      | TP53   | p.R282W,c.844C>T(7498,0.002)          | patients with MYD88 <sup>MUT</sup> treated with ibrutinib |
| pts#4      | CXCR4  | p.S338*,c.1013C>G(7335,0.0293)        | patients with MYD88 <sup>MUT</sup> treated with ibrutinib |
| pts#5      | TP53   | p.R248Q,c.743G>A(7740,0.0035)         | patients with MYD88 <sup>MUT</sup> treated with ibrutinib |
| pts#5      | TP53   | p.V272M,c.814G>A(7497,0.0027);        | patients with MYD88 <sup>MUT</sup> treated with ibrutinib |
| pts#6      | KDM6A  | p.L1189*,c.3565del(2842,0.0046)       | patients with MYD88 <sup>MUT</sup> treated with ibrutinib |
| pts#7      | CXCR4  | p.T318Nfs*26,c.952dup(7085,0.1495)    | patients with MYD88 <sup>MUT</sup> treated with ibrutinib |
| pts#8      | PTEN   | p.K267Rfs*9,c.800del(6727,0.0025)     | patients with MYD88 <sup>MUT</sup> treated with ibrutinib |
| pts#9      | NF1    | p.N730*,c.2187dup(8250,0.1122)        | patients with MYD88 <sup>MUT</sup> treated with ibrutinib |
| pts#9      | TP53   | p.H178Pfs*3,c.532dup(9343,0.0764)     | patients with MYD88 <sup>MUT</sup> treated with ibrutinib |
| pts#10     | TP53   | p.R273H,c.818G>A(9104,0.0023);        | patients with MYD88 <sup>MUT</sup> treated with ibrutinib |
| pts#10     | TP53   | p.Y220C,c.659A>G(9976,0.0012)         | patients with MYD88 <sup>MUT</sup> treated with ibrutinib |
| pts#11     | TP53   | p.R175L,c.524G>T(10153,0.1265)        | patients with MYD88 <sup>MUT</sup> treated with ibrutinib |
| pts#12     | TERT   | NA,c.-124C>T(10269,0.0316)            | patients with MYD88 <sup>MUT</sup> treated with ibrutinib |
| pts#12     | TP53   | p.R248P,c.743G>C(9014,0.0123)         | patients with MYD88 <sup>MUT</sup> treated with ibrutinib |
| pts#13     | ARID1A | p.E1387Rfs*94,c.4159del(7748,0.0607)  | patients with MYD88 <sup>MUT</sup> treated with ibrutinib |
| pts#13     | ARID1A | p.Q1327Afs*11,c.3977dup(8472,0.0146); | patients with MYD88 <sup>MUT</sup> treated with ibrutinib |
| pts#13     | CXCR4  | p.S338*,c.1013C>G(7422,0.1188)        | patients with MYD88 <sup>MUT</sup> treated with ibrutinib |
| pts#13     | TERT   | NA,c.-124C>T(8536,0.0056)             | patients with MYD88 <sup>MUT</sup> treated with ibrutinib |
| pts#13     | TP53   | p.N239Kfs*25,c.716dup(8016,0.0136)    | patients with MYD88 <sup>MUT</sup> treated with ibrutinib |
| pts#13     | TP53   | p.R280S,c.840A>C(8198,0.0101);        | patients with MYD88 <sup>MUT</sup> treated with ibrutinib |
| pts#13     | TP53   | p.R306*,c.916C>T(8404,0.0138);        | patients with MYD88 <sup>MUT</sup> treated with ibrutinib |
| pts#14     | TP53   | p.R273H,c.818G>A(8539,0.0015)         | patients with MYD88 <sup>MUT</sup> treated with ibrutinib |
| pts#15     | FGFR2  | p.R251Q,c.752G>A(8019,0.0175)         | patients with MYD88 <sup>MUT</sup> treated with ibrutinib |
| pts#16     | ARID1A | p.K1047*,c.3139A>T(7221,0.0043);      | patients with MYD88 <sup>MUT</sup> treated with ibrutinib |
| pts#16     | ARID1A | p.R1446*,c.4336C>T(6892,0.0942)       | patients with MYD88 <sup>MUT</sup> treated with ibrutinib |
| pts#16     | CXCR4  | p.S341Ffs*3,c.1021dup(7112,0.0796)    | patients with MYD88 <sup>MUT</sup> treated with ibrutinib |
| pts#17     | TP53   | p.H179Y,c.535C>T(9911,0.0017)         | patients with MYD88 <sup>MUT</sup> treated with ibrutinib |
| pts#18     | CHEK2  | NA,c.1462-2A>G(6604,0.0033);          | patients with MYD88 <sup>MUT</sup> treated with ibrutinib |
| pts#19     | ARID1A | p.P225Afs*175,c.671dup(5992,0.0714)   | patients with MYD88 <sup>MUT</sup> treated with ibrutinib |
| pts#19     | CDKN2A | Deletion(1.5)                         | patients with MYD88 <sup>MUT</sup> treated with ibrutinib |
| pts#19     | CXCR4  | p.S338*,c.1013C>A(5004,0.1089)        | patients with MYD88 <sup>MUT</sup> treated with ibrutinib |
| pts#20     | CHEK2  | p.E122*,c.364G>T(7990,0.0125)         | patients with MYD88 <sup>MUT</sup> treated with ibrutinib |
| pts#20     | TP53   | p.D281E,c.843C>G(8705,0.0034);        | patients with MYD88 <sup>MUT</sup> treated with ibrutinib |
| pts#20     | TP53   | p.R273H,c.818G>A(8598,0.0021)         | patients with MYD88 <sup>MUT</sup> treated with ibrutinib |
| pts#21     | ARID1A | p.G314Afs*49,c.941del(11412,0.0067)   | patients with MYD88 <sup>MUT</sup> treated with ibrutinib |
| pts#21     | CXCR4  | p.S338*,c.1013C>G(8085,0.0105)        | patients with MYD88 <sup>MUT</sup> treated with ibrutinib |
| pts#21     | TERT   | NA,c.-124C>T(8750,0.0067)             | patients with MYD88 <sup>MUT</sup> treated with ibrutinib |
| pts#22     | TP53   | p.R273H,c.818G>A(7084,0.0032)         | patients with MYD88 <sup>MUT</sup> treated with ibrutinib |
| pts#23     | CXCR4  | p.S341Pfs*25,c.1021del(7391,0.0077)   | patients with MYD88 <sup>MUT</sup> treated with ibrutinib |

|        |         |                                             |                                                           |
|--------|---------|---------------------------------------------|-----------------------------------------------------------|
| pts#24 | ARID1A  | p.Y815Lfs*18,c.2444del(6547,0.2331)         | patients with MYD88 <sup>MUT</sup> treated with ibrutinib |
| pts#24 | ATM     | Deletion(1.58)                              | patients with MYD88 <sup>MUT</sup> treated with ibrutinib |
| pts#24 | CXCR4   | p.L326Pfs*18,c.976dup(6240,0.2021)          | patients with MYD88 <sup>MUT</sup> treated with ibrutinib |
| pts#24 | PIK3CA  | p.H1047R,c.3140A>G(6478,0.0017)             | patients with MYD88 <sup>MUT</sup> treated with ibrutinib |
| pts#24 | SLC34A2 | Deletion(1.51)                              | patients with MYD88 <sup>MUT</sup> treated with ibrutinib |
| pts#24 | TP53    | Deletion(1.57)                              | patients with MYD88 <sup>MUT</sup> treated with ibrutinib |
| pts#24 | TP53    | p.R306*,c.916C>T(5305,0.2984);              | patients with MYD88 <sup>MUT</sup> treated with ibrutinib |
| pts#25 | CXCR4   | p.S338Ffs*3,c.1013_1020del(7523,0.0041)     | patients with MYD88 <sup>MUT</sup> treated with ibrutinib |
| pts#26 | TERT    | NA,c.-124C>T(9073,0.0385)                   | patients with MYD88 <sup>MUT</sup> treated with ibrutinib |
| pts#27 | TERT    | NA,c.-124C>T(9112,0.0034)                   | patients with MYD88 <sup>MUT</sup> treated with ibrutinib |
| pts#28 | TP53    | NA,c.673-1G>A(7150,0.0031);                 | patients with MYD88 <sup>MUT</sup> treated with ibrutinib |
| pts#28 | TP53    | p.R158_A159del,c.472_477del(9201,0.0045)    | patients with MYD88 <sup>MUT</sup> treated with ibrutinib |
| pts#29 | ARID1A  | p.L2106Ffs*37,c.6315_6334del(7593,0.003)    | patients with MYD88 <sup>MUT</sup> treated with ibrutinib |
| pts#29 | CXCR4   | p.S338*,c.1013C>G(6497,0.0586)              | patients with MYD88 <sup>MUT</sup> treated with ibrutinib |
| pts#29 | TP53    | p.E258V,c.773A>T(7483,0.0055);              | patients with MYD88 <sup>MUT</sup> treated with ibrutinib |
| pts#29 | TP53    | p.R110H,c.329G>A(7839,0.0478)               | patients with MYD88 <sup>MUT</sup> treated with ibrutinib |
| pts#30 | AKT2    | Amplification(2.65)                         | patients with MYD88 <sup>MUT</sup> treated with ibrutinib |
| pts#30 | ARID1A  | p.P146Qfs*86,c.437del(8825,0.3132)          | patients with MYD88 <sup>MUT</sup> treated with ibrutinib |
| pts#30 | ATRX    | Deletion(1.34)                              | patients with MYD88 <sup>MUT</sup> treated with ibrutinib |
| pts#30 | CCNE1   | Amplification(2.68)                         | patients with MYD88 <sup>MUT</sup> treated with ibrutinib |
| pts#30 | CXCR4   | p.S338*,c.1013C>A(7442,0.3416)              | patients with MYD88 <sup>MUT</sup> treated with ibrutinib |
| pts#30 | GNA11   | Amplification(2.77)                         | patients with MYD88 <sup>MUT</sup> treated with ibrutinib |
| pts#30 | KDM6A   | Deletion(1.29)                              | patients with MYD88 <sup>MUT</sup> treated with ibrutinib |
| pts#30 | KIT     | Amplification(2.54)                         | patients with MYD88 <sup>MUT</sup> treated with ibrutinib |
| pts#30 | MAP2K2  | Amplification(2.7)                          | patients with MYD88 <sup>MUT</sup> treated with ibrutinib |
| pts#30 | MAPK1   | Amplification(2.79)                         | patients with MYD88 <sup>MUT</sup> treated with ibrutinib |
| pts#30 | MYC     | Amplification(2.57)                         | patients with MYD88 <sup>MUT</sup> treated with ibrutinib |
| pts#30 | PDGFRA  | Amplification(2.54)                         | patients with MYD88 <sup>MUT</sup> treated with ibrutinib |
| pts#30 | STAG2   | Deletion(1.32)                              | patients with MYD88 <sup>MUT</sup> treated with ibrutinib |
| pts#31 | ARID1A  | p.G1610Dfs*37,c.4827_4828del(6495,0.0771)   | patients with MYD88 <sup>MUT</sup> treated with ibrutinib |
| pts#31 | CDKN2A  | Deletion(1.62)                              | patients with MYD88 <sup>MUT</sup> treated with ibrutinib |
| pts#31 | CXCR4   | p.S338*,c.1013C>G(5764,0.0871)              | patients with MYD88 <sup>MUT</sup> treated with ibrutinib |
| pts#31 | TERT    | NA,c.-124C>T(6831,0.0829)                   | patients with MYD88 <sup>MUT</sup> treated with ibrutinib |
| pts#32 | ARID1A  | p.A2097Mfs*38,c.6289_6290delinsA(5683,0.07) | patients with MYD88 <sup>MUT</sup> treated with ibrutinib |
| pts#32 | ATRX    | p.Q2368*,c.7102C>T(1983,0.0111)             | patients with MYD88 <sup>MUT</sup> treated with ibrutinib |
| pts#33 | TP53    | p.V216M,c.646G>A(9972,0.005)                | patients with MYD88 <sup>MUT</sup> treated with ibrutinib |
| pts#34 | RB1     | p.L486Yfs*9,c.1457del(9092,0.0046)          | patients with MYD88 <sup>MUT</sup> treated with ibrutinib |
| pts#34 | TP53    | p.R273H,c.818G>A(10090,0.0062)              | patients with MYD88 <sup>MUT</sup> treated with ibrutinib |
| pts#35 | KDM6A   | p.L347*,c.1040T>A(4083,0.0073)              | patients with MYD88 <sup>MUT</sup> treated with ibrutinib |
| pts#36 | CHEK2   | p.T367Mfs*15,c.1100del(8143,0.5013)         | patients with MYD88 <sup>MUT</sup> treated with ibrutinib |
| pts#37 | ARID1A  | p.P1568Hfs*37,c.4703_4724del(6284,0.0126)   | patients with MYD88 <sup>MUT</sup> treated with ibrutinib |
| pts#37 | CXCR4   | p.S338*,c.1013C>G(6728,0.038)               | patients with MYD88 <sup>MUT</sup> treated with ibrutinib |
| pts#38 | ARID1A  | p.Y422*,c.1266C>A(8724,0.0454)              | patients with MYD88 <sup>MUT</sup> treated with ibrutinib |
| pts#38 | CXCR4   | p.S338Lfs*27,c.1012_1015del(7521,0.0158);   | patients with MYD88 <sup>MUT</sup> treated with ibrutinib |
| pts#38 | CXCR4   | p.G323Rfs*21,c.965dup(8082,0.0552)          | patients with MYD88 <sup>MUT</sup> treated with ibrutinib |
| pts#38 | PIK3CA  | p.E545G,c.1634A>G(7372,0.0012)              | patients with MYD88 <sup>MUT</sup> treated with ibrutinib |
| pts#38 | TP53    | NA,c.783-2A>G(8543,0.0057);                 | patients with MYD88 <sup>MUT</sup> treated with ibrutinib |
| pts#38 | TP53    | p.R175H,c.524G>A(9587,0.0081)               | patients with MYD88 <sup>MUT</sup> treated with ibrutinib |
| pts#38 | TP53    | p.R273H,c.818G>A(8474,0.0077);              | patients with MYD88 <sup>MUT</sup> treated with ibrutinib |
| pts#38 | TP53    | p.Y205H,c.613T>C(9603,0.0409);              | patients with MYD88 <sup>MUT</sup> treated with ibrutinib |
| pts#39 | TP53    | NA,c.672+1G>A(10680,0.0033)                 | patients with MYD88 <sup>MUT</sup> treated with ibrutinib |

|        |        |                                           |                                                              |
|--------|--------|-------------------------------------------|--------------------------------------------------------------|
| pts#40 | ARID1A | p.A162Cfs*240,c.477_483dup(10892,0.0063)  | patients with MYD88 <sup>MUT</sup> treated with ibrutinib    |
| pts#40 | TP53   | p.S241C,c.722C>G(9167,0.061)              | patients with MYD88 <sup>MUT</sup> treated with ibrutinib    |
| pts#41 | KRAS   | p.Q61R,c.182A>G(6941,0.0012)              | patients with MYD88 <sup>MUT</sup> treated with ibrutinib    |
| pts#42 | RAD51B | p.Q371*,c.1111C>T(5806,0.0079)            | patients with MYD88 <sup>MUT</sup> treated with ibrutinib    |
| pts#43 | CDKN2A | p.R80*,c.238C>T(8448,0.0014)              | patients with MYD88 <sup>MUT</sup> treated with ibrutinib    |
| pts#43 | CXCR4  | p.S338*,c.1013C>G(7735,0.0804)            | patients with MYD88 <sup>MUT</sup> treated with ibrutinib    |
| pts#44 | ARID1A | Deletion(1.48)                            | patients with MYD88 <sup>MUT</sup> treated with ibrutinib    |
| pts#44 | CXCR4  | Amplification(2.86)                       | patients with MYD88 <sup>MUT</sup> treated with ibrutinib    |
| pts#44 | CXCR4  | p.S338*,c.1013C>A(10290,0.43);            | patients with MYD88 <sup>MUT</sup> treated with ibrutinib    |
| pts#44 | TERT   | NA,c.-124C>T(10692,0.0039)                | patients with MYD88 <sup>MUT</sup> treated with ibrutinib    |
| pts#44 | TERT   | NA,c.-124C>T(10954,0.0032);               | patients with MYD88 <sup>MUT</sup> treated with ibrutinib    |
| pts#44 | TP53   | NA,c.673-2A>G(6897,0.0042);               | patients with MYD88 <sup>MUT</sup> treated with ibrutinib    |
| pts#44 | TP53   | NA,c.673-2A>T(6897,0.0071);               | patients with MYD88 <sup>MUT</sup> treated with ibrutinib    |
| pts#44 | TP53   | NA,c.769_782+4del(6729,0.0202);           | patients with MYD88 <sup>MUT</sup> treated with ibrutinib    |
| pts#44 | TP53   | NA,c.782+1G>A(6754,0.0036);               | patients with MYD88 <sup>MUT</sup> treated with ibrutinib    |
| pts#44 | TP53   | p.A138P,c.412G>C(7444,0.3434)             | patients with MYD88 <sup>MUT</sup> treated with ibrutinib    |
| pts#44 | TP53   | p.H179R,c.536A>G(7895,0.0018);            | patients with MYD88 <sup>MUT</sup> treated with ibrutinib    |
| pts#44 | TP53   | p.I195F,c.583A>T(8145,0.0133);            | patients with MYD88 <sup>MUT</sup> treated with ibrutinib    |
| pts#44 | TP53   | p.L188_P190del,c.563_571del(8204,0.0048); | patients with MYD88 <sup>MUT</sup> treated with ibrutinib    |
| pts#44 | TP53   | p.Q167*,c.499C>T(7844,0.0119);            | patients with MYD88 <sup>MUT</sup> treated with ibrutinib    |
| pts#44 | TP53   | p.R175H,c.524G>A(7875,0.0076);            | patients with MYD88 <sup>MUT</sup> treated with ibrutinib    |
| pts#44 | TP53   | p.R273H,c.818G>A(7046,0.0051);            | patients with MYD88 <sup>MUT</sup> treated with ibrutinib    |
| pts#44 | TP53   | p.S240R,c.718A>C(7015,0.0038);            | patients with MYD88 <sup>MUT</sup> treated with ibrutinib    |
| pts#44 | TP53   | p.Y220C,c.659A>G(7832,0.1099);            | patients with MYD88 <sup>MUT</sup> treated with ibrutinib    |
| pts#45 | ATM    | p.R2443*,c.7327C>T(5789,0.4662)           | patients with MYD88 <sup>MUT</sup> treated with ibrutinib    |
| pts#45 | CXCR4  | p.S338*,c.1013C>G(6476,0.0188)            | patients with MYD88 <sup>MUT</sup> treated with ibrutinib    |
| pts#46 | MSH6   | p.L60*,c.179T>A(11998,0.0057)             | patients with MYD88 <sup>MUT</sup> treated with ibrutinib    |
| pts#47 | EZH2   | p.L77*,c.230T>A(5562,0.0117)              | patients with MYD88 <sup>MUT</sup> treated with ibrutinib    |
| pts#48 | CHEK2  | p.C243Lfs*4,c.728del(5682,0.0086)         | patients with MYD88 <sup>MUT</sup> treated with ibrutinib    |
| pts#48 | KDM6A  | p.T588Yfs*9,c.1761dup(4061,0.0172)        | patients with MYD88 <sup>MUT</sup> treated with ibrutinib    |
| pts#48 | TERT   | NA,c.-124C>T(6964,0.0045)                 | patients with MYD88 <sup>MUT</sup> treated with ibrutinib    |
| pts#49 | CXCR4  | p.S338*,c.1013C>A(6053,0.0302)            | patients with MYD88 <sup>MUT</sup> treated with ibrutinib    |
| pts#49 | TERT   | NA,c.-124C>T(6285,0.0056)                 | patients with MYD88 <sup>MUT</sup> treated with ibrutinib    |
| pts#49 | TERT   | NA,c.-57A>C(7094,0.0234);                 | patients with MYD88 <sup>MUT</sup> treated with ibrutinib    |
| pts#50 | ARID1A | p.G925Dfs*14,c.2774_2780del(7922,0.0139)  | patients with MYD88 <sup>MUT</sup> treated with ibrutinib    |
| pts#50 | CXCR4  | p.T318Nfs*26,c.952dup(8529,0.019)         | patients with MYD88 <sup>MUT</sup> treated with ibrutinib    |
| pts#51 | TP53   | p.V216M,c.646G>A(8011,0.0027)             | patients with MYD88 <sup>MUT</sup> treated with ibrutinib    |
| pts#52 | CCNE1  | p.Q277*,c.829C>T(5373,0.0065)             | patients with MYD88 <sup>MUT</sup> treated with ibrutinib    |
| pts#52 | CXCR4  | p.S338*,c.1013C>G(6794,0.0071)            | patients with MYD88 <sup>MUT</sup> treated with ibrutinib    |
| pts#52 | TP53   | p.Y220C,c.659A>G(7833,0.006)              | patients with MYD88 <sup>MUT</sup> treated with ibrutinib    |
| pts#53 | FANCL  | p.T367Nfs*13,c.1096_1099dup(5947,0.4286)  | patients with MYD88 <sup>MUT</sup> treated with zanubrutinib |
| pts#54 | ATM    | p.R337C,c.1009C>T(6068,0.0313)            | patients with MYD88 <sup>MUT</sup> treated with zanubrutinib |
| pts#54 | CXCR4  | p.S338*,c.1013C>A(6580,0.0462)            | patients with MYD88 <sup>MUT</sup> treated with zanubrutinib |
| pts#55 | ARID1A | p.R1276*,c.3826C>T(6224,0.2281)           | patients with MYD88 <sup>MUT</sup> treated with zanubrutinib |
| pts#55 | CXCR4  | p.R334*,c.1000C>T(5565,0.2165)            | patients with MYD88 <sup>MUT</sup> treated with zanubrutinib |
| pts#55 | MYC    | Amplification(2.88)                       | patients with MYD88 <sup>MUT</sup> treated with zanubrutinib |
| pts#55 | TP53   | Deletion(1.62)                            | patients with MYD88 <sup>MUT</sup> treated with zanubrutinib |
| pts#56 | ARID1A | p.Q467*,c.1399C>T(6362,0.4516)            | patients with MYD88 <sup>MUT</sup> treated with zanubrutinib |
| pts#56 | CXCR4  | p.S338*,c.1013C>G(2718,0.4636)            | patients with MYD88 <sup>MUT</sup> treated with zanubrutinib |
| pts#56 | FGFR3  | Amplification(3.24)                       | patients with MYD88 <sup>MUT</sup> treated with zanubrutinib |
| pts#56 | KMT2D  | p.P647Hfs*283,c.1940del(11642,0.006)      | patients with MYD88 <sup>MUT</sup> treated with zanubrutinib |

|        |               |                                           |                                                                    |
|--------|---------------|-------------------------------------------|--------------------------------------------------------------------|
| pts#56 | <i>MLH1</i>   | Deletion(1.1)                             | patients with <i>MYD88<sup>MUT</sup></i> treated with zanubrutinib |
| pts#56 | <i>PIK3CA</i> | Amplification(2.87)                       | patients with <i>MYD88<sup>MUT</sup></i> treated with zanubrutinib |
| pts#56 | <i>PTPN11</i> | p.G503E,c.1508G>A(3114,0.0071)            | patients with <i>MYD88<sup>MUT</sup></i> treated with zanubrutinib |
| pts#56 | <i>RAD50</i>  | p.K583Rfs*14,c.1748del(3258,0.0218)       | patients with <i>MYD88<sup>MUT</sup></i> treated with zanubrutinib |
| pts#56 | <i>RAD51B</i> | p.Q371*,c.1111C>T(12354,0.0552)           | patients with <i>MYD88<sup>MUT</sup></i> treated with zanubrutinib |
| pts#56 | <i>TERT</i>   | NA,c.-124C>T(33744,0.3868)                | patients with <i>MYD88<sup>MUT</sup></i> treated with zanubrutinib |
| pts#56 | <i>TP53</i>   | Deletion(1.28)                            | patients with <i>MYD88<sup>MUT</sup></i> treated with zanubrutinib |
| pts#56 | <i>TP53</i>   | p.C135F,c.404G>T(8776,0.8714);            | patients with <i>MYD88<sup>MUT</sup></i> treated with zanubrutinib |
| pts#57 | <i>ATM</i>    | p.W488*,c.1464G>A(7758,0.0032);           | patients with <i>MYD88<sup>MUT</sup></i> treated with zanubrutinib |
| pts#57 | <i>NBN</i>    | p.N141Kfs*12,c.423_432del(6546,0.0063)    | patients with <i>MYD88<sup>MUT</sup></i> treated with zanubrutinib |
| pts#58 | <i>TP53</i>   | p.I251N,c.752T>A(6959,0.005);             | patients with <i>MYD88<sup>MUT</sup></i> treated with zanubrutinib |
| pts#58 | <i>TP53</i>   | p.R175H,c.524G>A(8134,0.0118)             | patients with <i>MYD88<sup>MUT</sup></i> treated with zanubrutinib |
| pts#59 | <i>ARID1A</i> | p.Q799*,c.2395C>T(9962,0.0169)            | patients with <i>MYD88<sup>MUT</sup></i> treated with zanubrutinib |
| pts#60 | <i>CXCR4</i>  | p.T318Cfs*24,c.952_956del(7713,0.0054)    | patients with <i>MYD88<sup>MUT</sup></i> treated with zanubrutinib |
| pts#60 | <i>TP53</i>   | p.H179R,c.536A>G(7759,0.034)              | patients with <i>MYD88<sup>MUT</sup></i> treated with zanubrutinib |
| pts#61 | <i>CXCR4</i>  | p.S319Lfs*2,c.954del(7631,0.0206)         | patients with <i>MYD88<sup>MUT</sup></i> treated with zanubrutinib |
| pts#61 | <i>TERT</i>   | NA,c.-124C>T(9302,0.0114)                 | patients with <i>MYD88<sup>MUT</sup></i> treated with zanubrutinib |
| pts#62 | <i>ARID1A</i> | NA,c.3867-1G>A(8591,0.0101);              | patients with <i>MYD88<sup>MUT</sup></i> treated with zanubrutinib |
| pts#62 | <i>ARID1A</i> | p.L2053Ffs*38,c.6159_6181del(7967,0.0126) | patients with <i>MYD88<sup>MUT</sup></i> treated with zanubrutinib |
| pts#62 | <i>NBN</i>    | p.S42Afs*7,c.123del(5638,0.5035)          | patients with <i>MYD88<sup>MUT</sup></i> treated with zanubrutinib |
| pts#63 | <i>CXCR4</i>  | p.S330Qfs*13,c.988_989del(8513,0.263)     | patients with <i>MYD88<sup>MUT</sup></i> treated with zanubrutinib |
| pts#64 | <i>PAX5</i>   | fusion_JAK2-PAX5(14)                      | patients with <i>MYD88<sup>MUT</sup></i> treated with zanubrutinib |
| pts#64 | <i>TERT</i>   | NA,c.-146C>T(8109,0.007)                  | patients with <i>MYD88<sup>MUT</sup></i> treated with zanubrutinib |
| pts#65 | <i>KRAS</i>   | p.A59G,c.176C>G(8969,0.0016)              | patients with <i>MYD88<sup>MUT</sup></i> treated with zanubrutinib |
| pts#66 | <i>TP53</i>   | p.C135G,c.403T>G(9518,0.004)              | patients with <i>MYD88<sup>MUT</sup></i> treated with zanubrutinib |
| pts#66 | <i>TP53</i>   | p.C176F,c.527G>T(9837,0.0114);            | patients with <i>MYD88<sup>MUT</sup></i> treated with zanubrutinib |
| pts#67 | <i>TP53</i>   | p.C238S,c.713G>C(7676,0.0167)             | patients with <i>MYD88<sup>MUT</sup></i> treated with zanubrutinib |
| pts#68 | <i>ARID1A</i> | p.A1687Ifs*14,c.5059_5065del(4645,0.0222) | patients with <i>MYD88<sup>MUT</sup></i> treated with zanubrutinib |
| pts#68 | <i>CXCR4</i>  | p.S338Ffs*6,c.1012dup(4786,0.0244)        | patients with <i>MYD88<sup>MUT</sup></i> treated with zanubrutinib |
| pts#69 | <i>VHL</i>    | p.R167Q,c.500G>A(8625,0.003)              | patients with <i>MYD88<sup>MUT</sup></i> treated with zanubrutinib |
| pts#70 | <i>CXCR4</i>  | p.S338*,c.1013C>A(6137,0.0473)            | patients with <i>MYD88<sup>MUT</sup></i> treated with zanubrutinib |
| pts#70 | <i>TP53</i>   | p.G226Lfs*11,c.675_682del(6241,0.0215);   | patients with <i>MYD88<sup>MUT</sup></i> treated with zanubrutinib |
| pts#70 | <i>TP53</i>   | p.R175H,c.524G>A(6454,0.0626)             | patients with <i>MYD88<sup>MUT</sup></i> treated with zanubrutinib |
| pts#71 | <i>CHEK2</i>  | p.R346H,c.1037G>A(8420,0.0059)            | patients with <i>MYD88<sup>MUT</sup></i> treated with zanubrutinib |
| pts#71 | <i>CXCR4</i>  | p.R334*,c.1000C>T(8886,0.0479)            | patients with <i>MYD88<sup>MUT</sup></i> treated with zanubrutinib |
| pts#71 | <i>TERT</i>   | NA,c.-124C>T(9674,0.0326)                 | patients with <i>MYD88<sup>MUT</sup></i> treated with zanubrutinib |
| pts#71 | <i>TP53</i>   | p.H193R,c.578A>G(10219,0.0515)            | patients with <i>MYD88<sup>MUT</sup></i> treated with zanubrutinib |
| pts#72 | <i>CXCR4</i>  | p.S341Hfs*2,c.1021_1022del(8437,0.0036)   | patients with <i>MYD88<sup>MUT</sup></i> treated with zanubrutinib |
| pts#72 | <i>KDM6A</i>  | p.S1274Pfs*18,c.3820del(3872,0.0039)      | patients with <i>MYD88<sup>MUT</sup></i> treated with zanubrutinib |
| pts#73 | <i>ARID1A</i> | p.P225Afs*175,c.671dup(9040,0.0827);      | patients with <i>MYD88<sup>MUT</sup></i> treated with zanubrutinib |
| pts#73 | <i>ARID1A</i> | p.P977Qfs*5,c.2930del(8375,0.1226);       | patients with <i>MYD88<sup>MUT</sup></i> treated with zanubrutinib |
| pts#73 | <i>CXCR4</i>  | p.S338*,c.1013C>G(7660,0.1449)            | patients with <i>MYD88<sup>MUT</sup></i> treated with zanubrutinib |
| pts#73 | <i>MSH6</i>   | p.G54Wfs*36,c.158_159insA(10748,0.0108)   | patients with <i>MYD88<sup>MUT</sup></i> treated with zanubrutinib |
| pts#73 | <i>TERT</i>   | NA,c.-57A>C(9596,0.0987)                  | patients with <i>MYD88<sup>MUT</sup></i> treated with zanubrutinib |
| pts#73 | <i>TP53</i>   | p.D281Y,c.841G>T(8216,0.004);             | patients with <i>MYD88<sup>MUT</sup></i> treated with zanubrutinib |
| pts#73 | <i>TP53</i>   | p.V272M,c.814G>A(8327,0.006)              | patients with <i>MYD88<sup>MUT</sup></i> treated with zanubrutinib |
| pts#74 | <i>ARID1A</i> | p.Q1127*,c.3379C>T(7190,0.1917)           | patients with <i>MYD88<sup>MUT</sup></i> treated with zanubrutinib |
| pts#74 | <i>CXCR4</i>  | p.S319Cfs*24,c.956_957del(7464,0.1573)    | patients with <i>MYD88<sup>MUT</sup></i> treated with zanubrutinib |
| pts#74 | <i>MAPK3</i>  | Amplification(2.62)                       | patients with <i>MYD88<sup>MUT</sup></i> treated with zanubrutinib |
| pts#74 | <i>TERT</i>   | NA,c.-124C>T(8333,0.1457)                 | patients with <i>MYD88<sup>MUT</sup></i> treated with zanubrutinib |
| pts#74 | <i>TP53</i>   | p.Y220H,c.658T>C(9330,0.3539)             | patients with <i>MYD88<sup>MUT</sup></i> treated with zanubrutinib |

|        |        |                                             |                                                              |
|--------|--------|---------------------------------------------|--------------------------------------------------------------|
| pts#75 | CXCR4  | p.E345*,c.1032dup(5873,0.0043)              | patients with MYD88 <sup>MUT</sup> treated with zanubrutinib |
| pts#75 | MSH6   | p.L60Sfs*23,c.177_178insAGCCC(8846,0.0032)  | patients with MYD88 <sup>MUT</sup> treated with zanubrutinib |
| pts#76 | NF1    | p.R1947*,c.5839C>T(7942,0.0089)             | patients with MYD88 <sup>MUT</sup> treated with zanubrutinib |
| pts#77 | CXCR4  | p.G336Dfs*28,c.1007_1013del(7984,0.0089)    | patients with MYD88 <sup>MUT</sup> treated with zanubrutinib |
| pts#78 | KRAS   | p.A146V,c.437C>T(6746,0.0064)               | patients with MYD88 <sup>MUT</sup> treated with zanubrutinib |
| pts#79 | CXCR4  | p.S341Ffs*3,c.1021dup(11373,0.0127)         | patients with MYD88 <sup>MUT</sup> treated with zanubrutinib |
| pts#79 | FANCL  | p.M1?,c.2T>C(10901,0.4921)                  | patients with MYD88 <sup>MUT</sup> treated with zanubrutinib |
| pts#79 | KRAS   | p.A146V,c.437C>T(9709,0.0038)               | patients with MYD88 <sup>MUT</sup> treated with zanubrutinib |
| pts#79 | MAPK3  | Amplification(3.33)                         | patients with MYD88 <sup>MUT</sup> treated with zanubrutinib |
| pts#79 | TERT   | NA,c.-124C>T(15065,0.0042)                  | patients with MYD88 <sup>MUT</sup> treated with zanubrutinib |
| pts#80 | CXCR4  | p.H337Lfs*6,c.1010_1011del(6857,0.006)      | patients with MYD88 <sup>MUT</sup> treated with zanubrutinib |
| pts#81 | KRAS   | p.Q61H,c.183A>C(5345,0.0011)                | patients with MYD88 <sup>MUT</sup> treated with zanubrutinib |
| pts#81 | STAG2  | p.M163Wfs*20,c.486del(2835,0.0078);         | patients with MYD88 <sup>MUT</sup> treated with zanubrutinib |
| pts#81 | TERT   | NA,c.-124C>T(6972,0.0086)                   | patients with MYD88 <sup>MUT</sup> treated with zanubrutinib |
| pts#82 | ARID1A | p.P225Afs*175,c.671dup(8064,0.0537)         | patients with MYD88 <sup>MUT</sup> treated with zanubrutinib |
| pts#82 | CXCR4  | p.V340Hfs*2,c.1018_1022del(8117,0.0793)     | patients with MYD88 <sup>MUT</sup> treated with zanubrutinib |
| pts#83 | BRAF   | p.K601N,c.1803A>T(7378,0.0034)              | patients with MYD88 <sup>MUT</sup> treated with zanubrutinib |
| pts#83 | RAD51B | p.Q371*,c.1111C>T(6739,0.0062)              | patients with MYD88 <sup>MUT</sup> treated with zanubrutinib |
| pts#84 | TP53   | p.Y220C,c.659A>G(9127,0.0057)               | patients with MYD88 <sup>MUT</sup> treated with zanubrutinib |
| pts#85 | TP53   | Deletion(1.2)                               | patients with MYD88 <sup>MUT</sup> treated with zanubrutinib |
| pts#85 | TP53   | NA,c.559+1G>T(3815,0.01);                   | patients with MYD88 <sup>MUT</sup> treated with zanubrutinib |
| pts#85 | TP53   | NA,c.782+1G>A(3293,0.0055);                 | patients with MYD88 <sup>MUT</sup> treated with zanubrutinib |
| pts#85 | TP53   | p.A138P,c.412G>C(3854,0.0029);              | patients with MYD88 <sup>MUT</sup> treated with zanubrutinib |
| pts#85 | TP53   | p.C176F,c.527G>T(3778,0.0082);              | patients with MYD88 <sup>MUT</sup> treated with zanubrutinib |
| pts#85 | TP53   | p.D259V,c.776A>T(3278,0.0104);              | patients with MYD88 <sup>MUT</sup> treated with zanubrutinib |
| pts#85 | TP53   | p.K132M,c.395A>T(3810,0.0026);              | patients with MYD88 <sup>MUT</sup> treated with zanubrutinib |
| pts#85 | TP53   | p.L264Yfs*81,c.790del(3632,0.0033);         | patients with MYD88 <sup>MUT</sup> treated with zanubrutinib |
| pts#85 | TP53   | p.P278R,c.833C>G(3732,0.0032);              | patients with MYD88 <sup>MUT</sup> treated with zanubrutinib |
| pts#85 | TP53   | p.R110L,c.329G>T(4006,0.0057);              | patients with MYD88 <sup>MUT</sup> treated with zanubrutinib |
| pts#85 | TP53   | p.R175H,c.524G>A(3751,0.0032);              | patients with MYD88 <sup>MUT</sup> treated with zanubrutinib |
| pts#85 | TP53   | p.R249S,c.747G>T(3461,0.0061);              | patients with MYD88 <sup>MUT</sup> treated with zanubrutinib |
| pts#85 | TP53   | p.R273L,c.818G>T(3625,0.5004);              | patients with MYD88 <sup>MUT</sup> treated with zanubrutinib |
| pts#85 | TP53   | p.W53*,c.159G>A(3601,0.0069);               | patients with MYD88 <sup>MUT</sup> treated with zanubrutinib |
| pts#85 | TP53   | p.W91*,c.273G>A(4026,0.0055);               | patients with MYD88 <sup>MUT</sup> treated with zanubrutinib |
| pts#85 | TP53   | p.Y205D,c.613T>G(3972,0.0358);              | patients with MYD88 <sup>MUT</sup> treated with zanubrutinib |
| pts#86 | ARID1A | p.T300Nfs*100,c.898dup(8669,0.0077)         | patients with MYD88 <sup>MUT</sup> treated with zanubrutinib |
| pts#86 | TP53   | p.V157I,c.469G>A(6965,0.4923)               | patients with MYD88 <sup>MUT</sup> treated with zanubrutinib |
| pts#87 | CXCR4  | p.S338*,c.1013C>G(4238,0.2017)              | patients with MYD88 <sup>MUT</sup> treated with zanubrutinib |
| pts#87 | HNF1A  | p.G292Rfs*25,c.872dup(5266,0.0199)          | patients with MYD88 <sup>MUT</sup> treated with zanubrutinib |
| pts#88 | ATM    | p.L1541*,c.4622T>A(5429,0.0494)             | patients with MYD88 <sup>MUT</sup> treated with zanubrutinib |
| pts#88 | CXCR4  | p.T318Nfs*26,c.952dup(7675,0.0179)          | patients with MYD88 <sup>MUT</sup> treated with zanubrutinib |
| pts#88 | TERT   | NA,c.-124C>T(8534,0.0179)                   | patients with MYD88 <sup>MUT</sup> treated with zanubrutinib |
| pts#88 | TP53   | p.G266E,c.797G>A(8009,0.0397)               | patients with MYD88 <sup>MUT</sup> treated with zanubrutinib |
| pts#89 | ARID1A | p.E1647Dfs*5,c.4941_4947del(9126,0.0083)    | patients with MYD88 <sup>MUT</sup> treated with zanubrutinib |
| pts#89 | ARID1A | p.G945Pfs*64,c.2825_2831dup(8623,0.0111);   | patients with MYD88 <sup>MUT</sup> treated with zanubrutinib |
| pts#89 | ARID1A | p.Q1364Nfs*116,c.4090_4093del(8213,0.0622); | patients with MYD88 <sup>MUT</sup> treated with zanubrutinib |
| pts#89 | ARID1A | p.Q372*,c.1114C>T(8569,0.0327);             | patients with MYD88 <sup>MUT</sup> treated with zanubrutinib |
| pts#89 | ARID1A | p.S558Pfs*62,c.1671_1678del(8861,0.0037);   | patients with MYD88 <sup>MUT</sup> treated with zanubrutinib |
| pts#89 | ARID1A | p.Y1233*,c.3699del(8268,0.0083);            | patients with MYD88 <sup>MUT</sup> treated with zanubrutinib |
| pts#89 | CXCR4  | p.S338*,c.1013C>A(7694,0.3765)              | patients with MYD88 <sup>MUT</sup> treated with zanubrutinib |
| pts#89 | TERT   | NA,c.-124C>T(9758,0.0399)                   | patients with MYD88 <sup>MUT</sup> treated with zanubrutinib |

|         |               |                                               |                                                                    |
|---------|---------------|-----------------------------------------------|--------------------------------------------------------------------|
| pts#89  | <i>TP53</i>   | p.C275R,c.823T>C(8892,0.3065)                 | patients with <i>MYD88<sup>MUT</sup></i> treated with zanubrutinib |
| pts#90  | <i>CHEK2</i>  | p.T367Mfs*15,c.1100del(8442,0.4831)           | patients with <i>MYD88<sup>MUT</sup></i> treated with zanubrutinib |
| pts#90  | <i>CXCR4</i>  | p.H337Tfs*7,c.1007dup(8496,0.312)             | patients with <i>MYD88<sup>MUT</sup></i> treated with zanubrutinib |
| pts#90  | <i>MYCN</i>   | Amplification(2.61)                           | patients with <i>MYD88<sup>MUT</sup></i> treated with zanubrutinib |
| pts#90  | <i>PIK3CA</i> | Amplification(2.66)                           | patients with <i>MYD88<sup>MUT</sup></i> treated with zanubrutinib |
| pts#91  | <i>ATM</i>    | p.I2223Sfs*12,c.6666del(6699,0.0043)          | patients with <i>MYD88<sup>MUT</sup></i> treated with zanubrutinib |
| pts#92  | <i>ARID1A</i> | p.Y1555*,c.4664dup(6404,0.0787)               | patients with <i>MYD88<sup>MUT</sup></i> treated with zanubrutinib |
| pts#92  | <i>CXCR4</i>  | p.V340Cfs*4,c.1017dup(7233,0.0896)            | patients with <i>MYD88<sup>MUT</sup></i> treated with zanubrutinib |
| pts#92  | <i>IDH2</i>   | p.R140Q,c.419G>A(7737,0.133)                  | patients with <i>MYD88<sup>MUT</sup></i> treated with zanubrutinib |
| pts#92  | <i>TP53</i>   | p.M246K,c.737T>A(6316,0.0982)                 | patients with <i>MYD88<sup>MUT</sup></i> treated with zanubrutinib |
| pts#92  | <i>TP53</i>   | p.R273H,c.818G>A(6581,0.007);                 | patients with <i>MYD88<sup>MUT</sup></i> treated with zanubrutinib |
| pts#93  | <i>ARID1A</i> | p.Q2128*,c.6382C>T(8549,0.1627)               | patients with <i>MYD88<sup>MUT</sup></i> treated with zanubrutinib |
| pts#94  | <i>TP53</i>   | NA,c.375+1G>A(8337,0.0042)                    | patients with <i>MYD88<sup>MUT</sup></i> treated with zanubrutinib |
| pts#95  | <i>TP53</i>   | p.R110L,c.329G>T(8035,0.0031)                 | patients with <i>MYD88<sup>MUT</sup></i> treated with zanubrutinib |
| pts#95  | <i>TP53</i>   | p.T256P,c.766A>C(7112,0.0506);                | patients with <i>MYD88<sup>MUT</sup></i> treated with zanubrutinib |
| pts#96  | <i>CXCR4</i>  | p.H337Pfs*31,c.1009_1010insCTCCA(6815,0.0172) | patients with <i>MYD88<sup>MUT</sup></i> treated with zanubrutinib |
| pts#97  | <i>CXCR4</i>  | p.S339Ffs*3,c.1014_1018del(8875,0.0325)       | patients with <i>MYD88<sup>MUT</sup></i> treated with zanubrutinib |
| pts#98  | <i>CXCR4</i>  | p.S338*,c.1013C>A(6880,0.1709)                | patients with <i>MYD88<sup>MUT</sup></i> treated with zanubrutinib |
| pts#99  | <i>ARID1A</i> | p.Q748*,c.2242C>T(8100,0.019)                 | patients with <i>MYD88<sup>MUT</sup></i> treated with zanubrutinib |
| pts#99  | <i>CXCR4</i>  | p.R322Qfs*22,c.963dup(7375,0.0157)            | patients with <i>MYD88<sup>MUT</sup></i> treated with zanubrutinib |
| pts#99  | <i>PIK3CA</i> | p.H1047R,c.3140A>G(7789,0.0015)               | patients with <i>MYD88<sup>MUT</sup></i> treated with zanubrutinib |
| pts#99  | <i>TP53</i>   | NA,c.673-2A>C(7750,0.0045);                   | patients with <i>MYD88<sup>MUT</sup></i> treated with zanubrutinib |
| pts#99  | <i>TP53</i>   | NA,c.673-2A>T(7750,0.0053);                   | patients with <i>MYD88<sup>MUT</sup></i> treated with zanubrutinib |
| pts#99  | <i>TP53</i>   | NA,c.783-2A>T(7824,0.0038);                   | patients with <i>MYD88<sup>MUT</sup></i> treated with zanubrutinib |
| pts#99  | <i>TP53</i>   | p.C141S,c.422G>C(8146,0.0033)                 | patients with <i>MYD88<sup>MUT</sup></i> treated with zanubrutinib |
| pts#99  | <i>TP53</i>   | p.R175H,c.524G>A(8616,0.0036);                | patients with <i>MYD88<sup>MUT</sup></i> treated with zanubrutinib |
| pts#99  | <i>TP53</i>   | p.Y234C,c.701A>G(7531,0.0086);                | patients with <i>MYD88<sup>MUT</sup></i> treated with zanubrutinib |
| pts#100 | <i>KDM6A</i>  | p.G557Vfs*34,c.1668_1674del(4738,0.0281)      | patients with <i>MYD88<sup>MUT</sup></i> treated with zanubrutinib |
| pts#101 | <i>TP53</i>   | p.Y236C,c.707A>G(6904,0.0043)                 | patients with <i>MYD88<sup>MUT</sup></i> treated with zanubrutinib |
| pts#102 | <i>RB1</i>    | p.V654M,c.1960G>A(6179,0.0123)                | patients with <i>MYD88<sup>MUT</sup></i> treated with zanubrutinib |
| pts#102 | <i>TP53</i>   | p.R280G,c.838A>G(8026,0.0082)                 | patients with <i>MYD88<sup>MUT</sup></i> treated with zanubrutinib |
| pts#103 | <i>TP53</i>   | p.C242S,c.725_726delinsCA(7116,0.1766);       | patients with <i>MYD88<sup>MUT</sup></i> treated with zanubrutinib |
| pts#103 | <i>TP53</i>   | p.G266E,c.797G>A(6934,0.0055);                | patients with <i>MYD88<sup>MUT</sup></i> treated with zanubrutinib |
| pts#103 | <i>TP53</i>   | p.H193R,c.578A>G(7707,0.0016)                 | patients with <i>MYD88<sup>MUT</sup></i> treated with zanubrutinib |
| pts#104 | <i>CXCR4</i>  | p.S338*,c.1013C>A(7322,0.0097)                | patients with <i>MYD88<sup>MUT</sup></i> treated with zanubrutinib |
| pts#105 | <i>TP53</i>   | p.V173M,c.517G>A(7779,0.0094)                 | patients with <i>MYD88<sup>MUT</sup></i> treated with zanubrutinib |
| pts#105 | <i>TSC1</i>   | p.P196Lfs*14,c.587del(7587,0.0032)            | patients with <i>MYD88<sup>MUT</sup></i> treated with zanubrutinib |
| pts#106 | <i>TP53</i>   | p.E285K,c.853G>A(10317,0.0018)                | patients with <i>MYD88<sup>MUT</sup></i> treated with zanubrutinib |
| pts#107 | <i>CXCR4</i>  | p.S338*,c.1013C>G(5808,0.38)                  | patients with <i>MYD88<sup>MUT</sup></i> treated with zanubrutinib |
| pts#107 | <i>RB1</i>    | NA,c.1215+1G>A(3852,0.0047)                   | patients with <i>MYD88<sup>MUT</sup></i> treated with zanubrutinib |
| pts#107 | <i>TP53</i>   | NA,c.560-3T>G(8717,0.0037)                    | patients with <i>MYD88<sup>MUT</sup></i> treated with zanubrutinib |
| pts#107 | <i>TP53</i>   | p.P219S,c.655C>T(8303,0.0031);                | patients with <i>MYD88<sup>MUT</sup></i> treated with zanubrutinib |
| pts#108 | <i>CXCR4</i>  | p.S338Ffs*6,c.1012dup(8602,0.0548)            | patients with <i>MYD88<sup>MUT</sup></i> treated with zanubrutinib |
| pts#109 | <i>ARID1A</i> | p.Q456Hfs*163,c.1368del(6225,0.0178)          | patients with <i>MYD88<sup>MUT</sup></i> treated with zanubrutinib |
| pts#109 | <i>CXCR4</i>  | p.S338*,c.1013C>G(6804,0.0332)                | patients with <i>MYD88<sup>MUT</sup></i> treated with zanubrutinib |
| pts#110 | <i>BARD1</i>  | p.N18Tfs*40,c.51del(9449,0.0047)              | patients with <i>MYD88<sup>MUT</sup></i> treated with zanubrutinib |
| pts#110 | <i>MSH6</i>   | p.G54Wfs*36,c.158_159insA(12644,0.0102)       | patients with <i>MYD88<sup>MUT</sup></i> treated with zanubrutinib |
| pts#111 | <i>ARID1A</i> | p.P1296Lfs*5,c.3887del(8302,0.0037)           | patients with <i>MYD88<sup>MUT</sup></i> treated with zanubrutinib |
| pts#111 | <i>ARID1A</i> | p.Q537*,c.1609C>T(7997,0.0104);               | patients with <i>MYD88<sup>MUT</sup></i> treated with zanubrutinib |
| pts#111 | <i>CXCR4</i>  | p.T318Cfs*24,c.952_956del(7437,0.0176)        | patients with <i>MYD88<sup>MUT</sup></i> treated with zanubrutinib |
| pts#111 | <i>NRAS</i>   | p.Q61K,c.181C>A(6878,0.0145)                  | patients with <i>MYD88<sup>MUT</sup></i> treated with zanubrutinib |

|         |               |                                               |                                                                    |
|---------|---------------|-----------------------------------------------|--------------------------------------------------------------------|
| pts#112 | <i>CXCR4</i>  | p.G335*,c.1003_1025del(6479,0.0145)           | patients with <i>MYD88<sup>MUT</sup></i> treated with zanubrutinib |
| pts#113 | <i>ARID1A</i> | p.R1335*,c.4003C>T(6537,0.0387)               | patients with <i>MYD88<sup>MUT</sup></i> treated with zanubrutinib |
| pts#113 | <i>CHEK2</i>  | NA,c.684-1G>A(4017,0.007)                     | patients with <i>MYD88<sup>MUT</sup></i> treated with zanubrutinib |
| pts#113 | <i>CXCR4</i>  | p.S341Pfs*25,c.1021del(5827,0.0395)           | patients with <i>MYD88<sup>MUT</sup></i> treated with zanubrutinib |
| pts#113 | <i>STAG2</i>  | p.K584Rfs*2,c.1751del(2764,0.0033)            | patients with <i>MYD88<sup>MUT</sup></i> treated with zanubrutinib |
| pts#113 | <i>TP53</i>   | p.R273C,c.817C>T(6214,0.0459)                 | patients with <i>MYD88<sup>MUT</sup></i> treated with zanubrutinib |
| pts#114 | <i>CCND3</i>  | p.T283I,c.848C>T(6441,0.2469)                 | patients with <i>MYD88<sup>WT</sup></i>                            |
| pts#114 | <i>CXCR4</i>  | p.V320Efs*23,c.959_960del(7231,0.2466)        | patients with <i>MYD88<sup>WT</sup></i>                            |
| pts#114 | <i>PIK3CA</i> | Amplification(2.57)                           | patients with <i>MYD88<sup>WT</sup></i>                            |
| pts#115 | <i>NRAS</i>   | p.G12D,c.35G>A(6525,0.0032)                   | patients with <i>MYD88<sup>WT</sup></i>                            |
| pts#116 | <i>ERBB3</i>  | Amplification(2.89)                           | patients with <i>MYD88<sup>WT</sup></i>                            |
| pts#117 | <i>KDM6A</i>  | p.L1119Rfs*33,c.3355_3356insGAAG(3644,0.0129) | patients with <i>MYD88<sup>WT</sup></i>                            |
| pts#117 | <i>TP53</i>   | p.H214R,c.641A>G(10196,0.0036)                | patients with <i>MYD88<sup>WT</sup></i>                            |
| pts#118 | <i>CCND2</i>  | Amplification(2.79)                           | patients with <i>MYD88<sup>WT</sup></i>                            |
| pts#118 | <i>CDK4</i>   | Amplification(3.09)                           | patients with <i>MYD88<sup>WT</sup></i>                            |
| pts#118 | <i>ERBB3</i>  | Amplification(2.91)                           | patients with <i>MYD88<sup>WT</sup></i>                            |
| pts#118 | <i>KRAS</i>   | Amplification(2.78)                           | patients with <i>MYD88<sup>WT</sup></i>                            |
| pts#118 | <i>PIK3CA</i> | Amplification(2.91)                           | patients with <i>MYD88<sup>WT</sup></i>                            |
| pts#118 | <i>PIK3CB</i> | Amplification(2.86)                           | patients with <i>MYD88<sup>WT</sup></i>                            |
| pts#118 | <i>PTPN11</i> | Amplification(2.79)                           | patients with <i>MYD88<sup>WT</sup></i>                            |
| pts#118 | <i>RAD52</i>  | Amplification(2.78)                           | patients with <i>MYD88<sup>WT</sup></i>                            |
| pts#118 | <i>RAF1</i>   | Amplification(2.76)                           | patients with <i>MYD88<sup>WT</sup></i>                            |
| pts#118 | <i>RB1</i>    | p.L448Rfs*13,c.1343_1347del(10601,0.0395)     | patients with <i>MYD88<sup>WT</sup></i>                            |
| pts#119 | <i>TP53</i>   | p.R175H,c.524G>A(10670,0.0035)                | patients with <i>MYD88<sup>WT</sup></i>                            |
| pts#120 | <i>ARID1A</i> | p.A162Cfs*240,c.477_483dup(10767,0.0081)      | patients with <i>MYD88<sup>WT</sup></i>                            |
| pts#120 | <i>TP53</i>   | p.S241C,c.722C>G(9649,0.0652)                 | patients with <i>MYD88<sup>WT</sup></i>                            |
| pts#121 | <i>ATM</i>    | p.Q2297*,c.6889C>T(8721,0.0036);              | patients with <i>MYD88<sup>WT</sup></i>                            |
| pts#121 | <i>NBN</i>    | NA,c.702+1G>C(8063,0.0098)                    | patients with <i>MYD88<sup>WT</sup></i>                            |
| pts#122 | <i>TP53</i>   | NA,c.782+1G>T(9310,0.0091)                    | patients with <i>MYD88<sup>WT</sup></i>                            |
| pts#123 | <i>CDK4</i>   | Amplification(2.69)                           | patients with <i>MYD88<sup>WT</sup></i>                            |
| pts#124 | <i>BARD1</i>  | p.A23Rfs*35,c.67del(8691,0.0037)              | patients with <i>MYD88<sup>WT</sup></i>                            |

**Supplemental Table 2. Summary of numbers of patients with specific mutated genes in patients with *MYD88*<sup>MUT</sup> or *MYD88*<sup>WT</sup> treated by zanubrutinib or ibrutinib.**

| Gene                    | Patients with <i>MYD88</i> <sup>MUT</sup> treated with ibrutinib (n=92) | Patients with <i>MYD88</i> <sup>MUT</sup> treated with zanubrutinib (n=98) | Patients with <i>MYD88</i> <sup>MUT</sup> (n=190) | Patients with <i>MYD88</i> <sup>WT</sup> (n=20) |
|-------------------------|-------------------------------------------------------------------------|----------------------------------------------------------------------------|---------------------------------------------------|-------------------------------------------------|
| <i>CXCR4</i>            | 20                                                                      | 33                                                                         | 53                                                | 1                                               |
| <i>CXCR4 (NS)</i>       | 13                                                                      | 14                                                                         | 27                                                | 0                                               |
| <i>CXCR4 (FS)</i>       | 7                                                                       | 19                                                                         | 26                                                | 1                                               |
| <i>TP53</i>             | 22                                                                      | 26                                                                         | 48                                                | 4                                               |
| <i>ARID1A</i>           | 16                                                                      | 16                                                                         | 32                                                | 1                                               |
| <i>TERT</i>             | 9                                                                       | 10                                                                         | 19                                                | 0                                               |
| <i>ATM</i>              | 2                                                                       | 4                                                                          | 6                                                 | 1                                               |
| <i>PIK3CA</i>           | 2                                                                       | 3                                                                          | 5                                                 | 2                                               |
| <i>CHEK2</i>            | 4                                                                       | 3                                                                          | 7                                                 | 0                                               |
| <i>KDM6A</i>            | 4                                                                       | 2                                                                          | 6                                                 | 1                                               |
| <i>KRAS</i>             | 1                                                                       | 4                                                                          | 5                                                 | 1                                               |
| <i>RB1</i>              | 1                                                                       | 2                                                                          | 3                                                 | 1                                               |
| <i>MSH6</i>             | 1                                                                       | 3                                                                          | 4                                                 | 0                                               |
| <i>NBN</i>              | 1                                                                       | 2                                                                          | 3                                                 | 1                                               |
| <i>RAD51B</i>           | 1                                                                       | 2                                                                          | 3                                                 | 0                                               |
| <i>STAG2</i>            | 1                                                                       | 2                                                                          | 3                                                 | 0                                               |
| <i>ATRX</i>             | 3                                                                       | 0                                                                          | 3                                                 | 0                                               |
| <i>CDKN2A</i>           | 3                                                                       | 0                                                                          | 3                                                 | 0                                               |
| <i>FANCL</i>            | 0                                                                       | 2                                                                          | 2                                                 | 0                                               |
| <i>MAPK3</i>            | 0                                                                       | 2                                                                          | 2                                                 | 0                                               |
| <i>MYC</i>              | 1                                                                       | 1                                                                          | 2                                                 | 0                                               |
| <i>NF1</i>              | 1                                                                       | 1                                                                          | 2                                                 | 0                                               |
| <i>NRAS</i>             | 0                                                                       | 1                                                                          | 1                                                 | 1                                               |
| <i>PTPN11</i>           | 0                                                                       | 1                                                                          | 1                                                 | 1                                               |
| <i>BARD1</i>            | 0                                                                       | 1                                                                          | 1                                                 | 1                                               |
| <i>CCNE1</i>            | 2                                                                       | 0                                                                          | 2                                                 | 0                                               |
| <i>CDK4</i>             | 0                                                                       | 0                                                                          | 0                                                 | 2                                               |
| <i>ERBB3</i>            | 0                                                                       | 0                                                                          | 0                                                 | 2                                               |
| <i>MLH1</i>             | 0                                                                       | 1                                                                          | 1                                                 | 0                                               |
| <i>BRAF</i>             | 0                                                                       | 1                                                                          | 1                                                 | 0                                               |
| <i>FGFR3</i>            | 0                                                                       | 1                                                                          | 1                                                 | 0                                               |
| <i>HNF1A</i>            | 0                                                                       | 1                                                                          | 1                                                 | 0                                               |
| <i>IDH2</i>             | 0                                                                       | 1                                                                          | 1                                                 | 0                                               |
| <i>KMT2D</i>            | 0                                                                       | 1                                                                          | 1                                                 | 0                                               |
| <i>MYCN</i>             | 0                                                                       | 1                                                                          | 1                                                 | 0                                               |
| <i>PAX5-JAK2 fusion</i> | 0                                                                       | 1                                                                          | 1                                                 | 0                                               |



|                |   |   |   |   |
|----------------|---|---|---|---|
| <i>RAD50</i>   | 0 | 1 | 1 | 0 |
| <i>TSC1</i>    | 0 | 1 | 1 | 0 |
| <i>VHL</i>     | 0 | 1 | 1 | 0 |
| <i>AKT2</i>    | 1 | 0 | 1 | 0 |
| <i>CCND2</i>   | 0 | 0 | 0 | 1 |
| <i>CCND3</i>   | 0 | 0 | 0 | 1 |
| <i>EZH2</i>    | 1 | 0 | 1 | 0 |
| <i>FGFR2</i>   | 1 | 0 | 1 | 0 |
| <i>GNA11</i>   | 1 | 0 | 1 | 0 |
| <i>MAP2K2</i>  | 1 | 0 | 1 | 0 |
| <i>MAPK1</i>   | 1 | 0 | 1 | 0 |
| <i>PDGFRA</i>  | 1 | 0 | 1 | 0 |
| <i>PIK3CB</i>  | 0 | 0 | 0 | 1 |
| <i>PTEN</i>    | 1 | 0 | 1 | 0 |
| <i>RAD52</i>   | 0 | 0 | 0 | 1 |
| <i>RAF1</i>    | 0 | 0 | 0 | 1 |
| <i>SLC34A2</i> | 1 | 0 | 1 | 0 |
| <i>KIT</i>     | 1 | 0 | 1 | 0 |

**Supplemental Table 3. *TP53*, *TERT*, and *ARID1A* mutation rate by *CXCR4* or *MYD88***

**status.** Mutation rate comparison of *TP53*, *TERT*, and *ARID1A* by *CXCR4* or *MYD88* status in 210 next-generation sequencing–evaluable WM patients. *TP53*<sup>MUT</sup>, *ARID1A*<sup>MUT</sup>, and *TERT*<sup>MUT</sup> were associated with a higher rate of *CXCR4*<sup>MUT</sup>. *TP53*<sup>MUT</sup> rates were similar between patients with *MYD88*<sup>MUT</sup> and *MYD88*<sup>WT</sup>, *TERT*<sup>MUT</sup>, and *ARID1A*<sup>MUT</sup> were more often detected in patients with *MYD88*<sup>MUT</sup>. *P* value was calculated by Fisher’s exact test. *MYD88* status was assessed by PCR-based assay, and *CXCR4* status was evaluated by next-generation sequencing. FS, frameshift; MUT, mutated; NS, nonsense; WM, Waldenström macroglobulinemia; WT, wild-type.

| Mutation rate, n (%) | <i>MYD88</i> <sup>WT</sup><br>(n=20) | <i>MYD88</i> <sup>MUT</sup><br>(n=190) | <i>P</i> value | <i>CXCR4</i> <sup>WT</sup><br>(n=156) | <i>CXCR4</i> <sup>MUT</sup><br>(n=54) | <i>P</i> value | <i>CXCR4</i> <sup>FS</sup><br>(n=27) | <i>P</i> value | <i>CXCR4</i> <sup>NS</sup><br>(n=27) | <i>P</i> value |
|----------------------|--------------------------------------|----------------------------------------|----------------|---------------------------------------|---------------------------------------|----------------|--------------------------------------|----------------|--------------------------------------|----------------|
| <i>TP53</i> status   |                                      |                                        |                |                                       |                                       |                |                                      |                |                                      |                |
| Wild-type            | 16 (80.0)                            | 142 (74.7)                             |                | 123 (78.8)                            | 35 (64.8)                             |                | 19 (70.3)                            |                | 16 (59.3)                            |                |
| Mutated              | 4 (20.0)                             | 48 (25.3)                              | 0.787          | 33 (21.2)                             | 19 (35.2)                             | 0.046          | 8 (29.6)                             | 0.633          | 11 (40.7)                            | 0.055          |
| <i>ARID1A</i> status |                                      |                                        |                |                                       |                                       |                |                                      |                |                                      |                |
| Wild-type            | 19 (95.0)                            | 158 (83.2)                             |                | 147 (94.2)                            | 30 (55.6)                             |                | 16 (59.3)                            |                | 14 (51.9)                            |                |
| Mutated              | 1 (5.0)                              | 32 (16.8)                              | 0.212          | 9 (5.8)                               | 24 (44.4)                             | <0.001         | 11 (40.7)                            | <0.001         | 13 (48.2)                            | <0.001         |
| <i>TERT</i> status   |                                      |                                        |                |                                       |                                       |                |                                      |                |                                      |                |
| Wild-type            | 20 (100.0)                           | 171 (90.0)                             |                | 150 (96.1)                            | 41 (75.9)                             |                | 23 (85.2)                            |                | 18 (66.7)                            |                |
| Mutated              | 0 (0.0)                              | 19 (10.0)                              | 0.227          | 6 (3.9)                               | 13 (24.1)                             | <0.001         | 4 (14.8)                             | 0.278          | 9 (33.3)                             | <0.001         |

**Supplemental Table 4. Mutation rate of *CXCR4*, *TP53*, *TERT*, *ARID1A* by treatment arms in *MYD88*<sup>MUT</sup> WM patients.**

The mutation rate of *CXCR4*, *TP53*, *ARID1A*, and *TERT* was compared between zanubrutinib-treated and ibrutinib-treated *MYD88*<sup>MUT</sup> WM patients. Zanubrutinib-treated *MYD88*<sup>MUT</sup> had higher *CXCR4*<sup>FS</sup> rate than ibrutinib-treated *MYD88*<sup>MUT</sup>. Comparison analysis was conducted in 190 next-generation sequencing–evaluable *MYD88*<sup>MUT</sup> WM patients. *P* value was calculated by Fisher’s exact test. FS, frameshift; MUT, mutated; NS, nonsense; WM, Waldenström macroglobulinemia; WT, wild-type.

| Mutation rate, n (%) | Patients with <i>MYD88</i> <sup>MUT</sup> treated with zanubrutinib (n=98) | Patients with <i>MYD88</i> <sup>MUT</sup> treated with ibrutinib (n=92) | P value |
|----------------------|----------------------------------------------------------------------------|-------------------------------------------------------------------------|---------|
| <i>CXCR4</i> status  |                                                                            |                                                                         |         |
| Wild-type            | 65 (66.3)                                                                  | 72 (78.3)                                                               | -       |
| Mutated              | 33 (33.7)                                                                  | 20 (21.7)                                                               | 0.076   |
| FS                   | 19 (19.4)                                                                  | 7 (7.6)                                                                 | 0.021   |
| NS                   | 14 (14.3)                                                                  | 13 (14.2)                                                               | 1.000   |
| <i>TP53</i> status   |                                                                            |                                                                         |         |
| Wild-type            | 72 (73.5)                                                                  | 70 (76.1)                                                               | -       |
| Mutated              | 26 (26.5)                                                                  | 22 (23.9)                                                               | 0.740   |
| <i>ARID1A</i> status |                                                                            |                                                                         |         |
| Wild-type            | 82 (83.7)                                                                  | 76 (82.6)                                                               | -       |
| Mutated              | 16 (16.3)                                                                  | 16 (17.4)                                                               | 0.849   |
| <i>TERT</i> status   |                                                                            |                                                                         |         |
| Wild-type            | 88 (89.8)                                                                  | 83 (90.2)                                                               | -       |
| Mutated              | 10 (10.2)                                                                  | 9 (9.8)                                                                 | 1.000   |

**Supplemental Table 5. *TP53* alterations by *CXCR4* status and by treatment arms in patients with *MYD88*<sup>MUT</sup> WM.**

*MYD88*<sup>MUT</sup> WM patients treated with ibrutinib or zanubrutinib were separately classified into four subgroups based on *TP53* VAF and deletion status, including: *TP53* mutation/deletion not detected (*TP53*<sup>WT</sup>), *TP53*<sup>MUT</sup> with VAF between 0.25% and <1% (*TP53*<sup>VAF<1%</sup>), *TP53*<sup>MUT</sup> with 1% ≤ VAF <10% (*TP53*<sup>1%≤VAF<10%</sup>), *TP53*<sup>MUT</sup> with VAF ≥10% or deletion (*TP53*<sup>VAF≥10% or deletion</sup>). For patients with multiple *TP53* mutations, the maximum VAF was used for classification. Correlation analysis of *TP53* alteration and *CXCR4* status show that *TP53* mutations with VAF ≥1% or deletion is associated with higher rate of *CXCR4*<sup>NS</sup>. More patients with *TP53* VAF ≥1% or deletion were randomized in the zanubrutinib arm compared to ibrutinib arm. Difference was compared between patients with *TP53* VAF ≥1% or deletion and *TP53* VAF <1% or wildtype, the *P* value was calculated by Fisher's exact test. FS, frameshift; MUT, mutated; NS, nonsense; VAF, variant allele frequency; WM, Waldenström macroglobulinemia; WT, wild-type.

| Subgroups                                                                        | <i>TP53</i> <sup>WT</sup><br>(N=142) | <i>TP53</i> <sup>VAF&lt;1%</sup><br>(N=22) | <i>TP53</i> <sup>1%≤VAF&lt;10%</sup><br>(N=16) | <i>TP53</i> <sup>VAF≥10% or deletion</sup><br>(N=10) | P-value |
|----------------------------------------------------------------------------------|--------------------------------------|--------------------------------------------|------------------------------------------------|------------------------------------------------------|---------|
| CXCR4 mutational status                                                          |                                      |                                            |                                                |                                                      |         |
| <i>CXCR4</i> <sup>WT</sup> (n=137)                                               | 108 (76.1)                           | 18 (81.8)                                  | 7 (43.8)                                       | 4 (40.0)                                             | -       |
| <i>CXCR4</i> <sup>MUT</sup> (n=53)                                               | 34 (23.9)                            | 4 (18.2)                                   | 9 (56.3)                                       | 6 (60.0)                                             | <0.001  |
| <i>CXCR4</i> <sup>FS</sup> (n=26)                                                | 18 (12.7)                            | 1 (4.6)                                    | 5 (31.3)                                       | 2 (20.0)                                             | 0.059   |
| <i>CXCR4</i> <sup>NS</sup> (n=27)                                                | 16 (11.3)                            | 3 (13.6)                                   | 4 (25.0)                                       | 4 (40.0)                                             | 0.016   |
| Treatment arm                                                                    |                                      |                                            |                                                |                                                      |         |
| patients with <i>MYD88</i> <sup>MUT</sup><br>treated with ibrutinib<br>(n=92)    | 70 (49.3)                            | 13 (59.1)                                  | 6 (37.5)                                       | 3 (30.0)                                             | -       |
| patients with <i>MYD88</i> <sup>MUT</sup><br>treated with zanubrutinib<br>(n=98) | 72 (50.7)                            | 9 (40.9)                                   | 10 (62.5)                                      | 7 (70.0)                                             | 0.144   |

**Supplemental Table 6. Response assessment by *TP53* alterations status and by treatment in patients with *MYD88*<sup>MUT</sup> WM.**

Response rate (VGPR+CR or major response), time to response, and PFS were compared within four subgroups based on *TP53* VAF and deletion status including *TP53*<sup>WT</sup>, *TP53*<sup>VAF<1%</sup>, *TP53*<sup>1%≤VAF<10%</sup>, *TP53*<sup>VAF≥10% or deletion</sup>. CR, complete response; MUT, mutated; NE, not estimable; PFS, progression-free survival; VAF, variant allele frequency; VGPR, very good partial response; WM, Waldenström macroglobulinemia; WT, wildtype.

| Patients with <i>MYD88</i> <sup>MUT</sup> treated with ibrutinib (n=92)    |                                     |                                            |                                                |                                                     |
|----------------------------------------------------------------------------|-------------------------------------|--------------------------------------------|------------------------------------------------|-----------------------------------------------------|
|                                                                            | <i>TP53</i> <sup>WT</sup><br>(N=70) | <i>TP53</i> <sup>VAF&lt;1%</sup><br>(N=13) | <i>TP53</i> <sup>1%≤VAF&lt;10%</sup><br>(N=6)  | <i>TP53</i> <sup>VAF≥10% or deletion</sup><br>(N=3) |
| <b>VGPR or better, n (%)</b>                                               | 21 (30.0)                           | 3 (23.1)                                   | 0 (0.0)                                        | 0 (0.0)                                             |
| <b>Major response, n (%)</b>                                               | 60 (85.7)                           | 9 (69.2)                                   | 4 (66.7)                                       | 1 (33.3)                                            |
| <b>Time to VGPR or better, median (min, max), months</b>                   | 11.4 (2.0, 49.9)                    | 24.9 (5.6, 46.9)                           | NE                                             | NE                                                  |
| <b>Time to major response, median (min, max), months</b>                   | 2.9 (0.9, 49.8)                     | 3.0 (1.0, 8.5)                             | 4.8 (1.0, 13.8)                                | 1.9 (1.9, 1.9)                                      |
| <b>PFS</b>                                                                 |                                     |                                            |                                                |                                                     |
| Event-free rate at 42 months, %                                            | 72.2                                | 72.7                                       | 41.7                                           | 33.3                                                |
| Median, months                                                             | NE                                  | NE                                         | 21.7                                           | 38.6                                                |
| Patients with <i>MYD88</i> <sup>MUT</sup> treated with zanubrutinib (n=98) |                                     |                                            |                                                |                                                     |
|                                                                            | <i>TP53</i> <sup>WT</sup><br>(n=72) | <i>TP53</i> <sup>VAF&lt;1%</sup><br>(n=9)  | <i>TP53</i> <sup>1%≤VAF&lt;10%</sup><br>(n=10) | <i>TP53</i> <sup>VAF≥10% or deletion</sup><br>(n=7) |
| <b>VGPR or better, n (%)</b>                                               | 27 (37.5)                           | 3 (33.3)                                   | 3 (30.0)                                       | 3 (42.9)                                            |
| <b>Major response, n (%)</b>                                               | 59 (81.9)                           | 7 (77.8)                                   | 8 (80.0)                                       | 6 (85.7)                                            |
| <b>Time to VGPR or better, median (min, max), months</b>                   | 6.5 (1.9, 42.0)                     | 4.7 (3.0, 25.7)                            | 11.1 (11.1, 26.0)                              | 6.7 (4.7, 22.1)                                     |
| <b>Time to major response, median (min, max), months</b>                   | 2.8 (0.9, 49.8)                     | 2.9 (1.8, 4.6)                             | 2.8 (1.0, 5.6)                                 | 2.8 (1.0, 3.7)                                      |

|                                                             |                                                   |                                                         |                                                             |                                                                   |
|-------------------------------------------------------------|---------------------------------------------------|---------------------------------------------------------|-------------------------------------------------------------|-------------------------------------------------------------------|
| <b>PFS</b>                                                  |                                                   |                                                         |                                                             |                                                                   |
| Event-free rate at 42 months, %                             | 84.6                                              | 75                                                      | 53.3                                                        | 57.1                                                              |
| Median, months                                              | NE                                                | NE                                                      | NE                                                          | NE                                                                |
| <b>All patients with <i>MYD88</i><sup>MUT</sup> (n=190)</b> |                                                   |                                                         |                                                             |                                                                   |
|                                                             | <b><i>TP53</i><sup>WT</sup></b><br><b>(n=142)</b> | <b><i>TP53</i><sup>VAF&lt;1%</sup></b><br><b>(n=22)</b> | <b><i>TP53</i><sup>1%≤VAF&lt;10%</sup></b><br><b>(n=16)</b> | <b><i>TP53</i><sup>VAF≥10% or deletion</sup></b><br><b>(n=10)</b> |
| <b>VGPR or better, n (%)</b>                                | 48 (33.8)                                         | 6 (27.3)                                                | 3 (18.8)                                                    | 3 (30.0)                                                          |
| <b>Major response, n (%)</b>                                | 119 (83.8)                                        | 16 (72.7)                                               | 12 (75.0)                                                   | 7 (70.0)                                                          |
| <b>Time to VGPR or better, median (min, max), months</b>    | 9.3 (1.9, 49.9)                                   | 15.2 (3.0, 46.9)                                        | 11.1 (11.1, 26.0)                                           | 6.7 (4.7, 22.1)                                                   |
| <b>Time to major response, median (min, max), months</b>    | 2.9 (0.9, 49.8)                                   | 2.9 (1.0, 8.5)                                          | 2.9 (1.0, 13.8)                                             | 2.8 (1.0, 3.7)                                                    |
| <b>PFS</b>                                                  |                                                   |                                                         |                                                             |                                                                   |
| Event-free rate at 42 months, %                             | 78.4                                              | 74.1                                                    | 49.2                                                        | 48                                                                |
| Median, months                                              | NE                                                | NE                                                      | 33.2                                                        | 38.6                                                              |



**Supplementary Table 7. Co-occurrences of *CXCR4* and *TP53* mutations in patients with *TERT*<sup>MUT</sup>.**

A total of 19 patients with *MYD88*<sup>MUT</sup> detected *TERT*<sup>MUT</sup>, including nine treated with ibrutinib and 10 treated with zanubrutinib. Patients with *TERT*<sup>MUT</sup>, especially those with PFS events, had high rates of *CXCR4* or *TP53* co-mutations in both ibrutinib-treated and zanubrutinib-treated groups. Zanubrutinib treatment group had more patients with co-mutations of *TERT*, *CXCR4*, *TP53* than ibrutinib treatment group (60% vs 22.2%). MUT, mutated; PFS, progression-free survival; WT, wildtype.

| <b>Patients with <i>TERT</i><sup>MUT</sup> treated with ibrutinib (n=9)</b>     |                         |                                  |                                     |
|---------------------------------------------------------------------------------|-------------------------|----------------------------------|-------------------------------------|
| <b>Co-mutation with</b>                                                         | <b>Total<br/>(N=9)</b>  | <b>With PFS events<br/>(n=3)</b> | <b>Without PFS events<br/>(n=6)</b> |
| <i>CXCR4</i> <sup>MUT</sup> , n (%)                                             | 5 (55.6)                | 2 (66.7)                         | 3 (50.0)                            |
| <i>TP53</i> <sup>MUT</sup> , n (%)                                              | 3 (33.3)                | 3 (100.0)                        | 0 (0.0)                             |
| <b>Both <i>CXCR4</i><sup>MUT</sup> and <i>TP53</i><sup>MUT</sup>, n (%)</b>     | <b>2 (22.2)</b>         | <b>2 (66.7)</b>                  | <b>0 (0.0)</b>                      |
| <b>Patients with <i>TERT</i><sup>MUT</sup> treated with zanubrutinib (n=10)</b> |                         |                                  |                                     |
| <b>Co-mutation with</b>                                                         | <b>Total<br/>(N=10)</b> | <b>With PFS events<br/>(n=6)</b> | <b>Without PFS events<br/>(n=4)</b> |
| <i>CXCR4</i> <sup>MUT</sup> , n (%)                                             | 8 (80.0)                | 5 (83.3)                         | 3 (75.0)                            |
| <i>TP53</i> <sup>MUT</sup> , n (%)                                              | 6 (60.0)                | 5 (83.3)                         | 1 (25.0)                            |
| <b>Both <i>CXCR4</i><sup>MUT</sup> and <i>TP53</i><sup>MUT</sup>, n (%)</b>     | <b>6 (60.0)</b>         | <b>5 (83.3)</b>                  | <b>1 (25.0)</b>                     |

**Supplemental Table 8. Genetic variants and paired analysis of five WM patients at the time of progressive disease.**

PD samples and baseline samples from five patients who progressed after achieving a response on zanubrutinib (three *MYD88*<sup>MUT</sup>, two *MYD88*<sup>WT</sup>) were tested by NGS panels covering 106 genes and 152 genes, respectively. Variants not covered by NGS panel were marked as unknown. Baseline data were not available for patient #1 and genetic variants were marked as unknown. Patient #3 had VGPR when collecting post-treatment samples, but disease progression occurred 14 months after sampling. BOR, best overall response; MR, minor response; MUT, mutated; NGS, next-generation sequencing; PD, progressive disease; PR, partial response; RR, relapsed/refractory; TN, treatment naïve; VAF, variant allele frequency; VGPR, very good partial response.

| Patient ID | TN/RR status | Treatment ( <i>MYD88</i> status)             | BOR | On-treatment duration, months | Gene          | At PD         |         | At Screening |         |
|------------|--------------|----------------------------------------------|-----|-------------------------------|---------------|---------------|---------|--------------|---------|
|            |              |                                              |     |                               |               | Mutation      | VAF (%) | Mutation     | VAF (%) |
| PD #1      | RR           | Zanubrutinib ( <i>MYD88</i> <sup>MUT</sup> ) | PR  | 34.5                          | <i>BTK</i>    | C481S         | 8.16    | Unknown      |         |
|            |              |                                              |     |                               | <i>TP53</i>   | R248G         | 19.76   | Unknown      |         |
|            |              |                                              |     |                               | <i>TP53</i>   | Deletion      |         | Unknown      |         |
|            |              |                                              |     |                               | <i>MYC</i>    | Amplification |         | Unknown      |         |
|            |              |                                              |     |                               | <i>NOTCH1</i> | Amplification |         | Unknown      |         |
|            |              |                                              |     |                               | <i>BIRC3</i>  | R549Afs*10    | 22.31   | Unknown      |         |
| PD #2      | RR           | Zanubrutinib ( <i>MYD88</i> <sup>MUT</sup> ) | PR  | 33.4                          | <i>CXCR4</i>  | T318Nfs*26    | 4.13    | T318Nfs*26   | 1.78    |
|            |              |                                              |     |                               | <i>TP53</i>   | G266E         | 7.68    | G266E        | 3.97    |
|            |              |                                              |     |                               | <i>TERT</i>   | -124C>T       | 3.85    | -124C>T      | 1.79    |
|            |              |                                              |     |                               | <i>ATM</i>    | L1541*        | 3.32    | L1541*       | 4.93    |
|            |              |                                              |     |                               | <i>EP300</i>  | M2106Cfs*28   | 1.57    | Unknown      |         |

|       |    |                                         |      |      |        |             |      |               |       |
|-------|----|-----------------------------------------|------|------|--------|-------------|------|---------------|-------|
| PD #3 | RR | Zanubrutinib<br>(MYD88 <sup>MUT</sup> ) | VGPR | 21.2 | CXCR4  | S338*       | 4.62 | S341Hfs*2     | 0.35  |
|       |    |                                         |      |      | TP53   | R248Q       | 0.58 | Not detected  |       |
|       |    |                                         |      |      |        | D281Y       | 0.24 | Not detected  |       |
|       |    |                                         |      |      | TERT   | -57A>C      | 5.18 | Not detected  |       |
|       |    |                                         |      |      | ARID1A | P225Afs*175 | 3.09 | Not detected  |       |
|       |    |                                         |      |      |        | P977Qfs*5   | 5.28 | Not detected  |       |
|       |    |                                         |      |      | KDM6A  | Unknown     |      | S1274Pfs*18   | 0.38  |
| PD #4 | TN | Zanubrutinib<br>(MYD88 <sup>WT</sup> )  | PR   | 10.2 | TP53   | H214R       | 0.21 | H214R         | 0.36  |
|       |    |                                         |      |      | KDM6A  | Unknown     |      | L1119Rfs*33   | 1.28  |
| PD #5 | RR | Zanubrutinib<br>(MYD88 <sup>WT</sup> )  | VGPR | 27.9 | CXCR4  | V320Efs*23  | 1.14 | V320Efs*23    | 24.65 |
|       |    |                                         |      |      | CCND3  | T283I       | 1.37 | T283I         | 24.68 |
|       |    |                                         |      |      | CDKN2A | Deletion    |      | Not detected  |       |
|       |    |                                         |      |      | PIK3CA | Unknown     |      | Amplification |       |

**Supplemental Figure 1. PFS by *CXCR4*, *TP53*, *TERT* VAF status in patients with *MYD88*<sup>MUT</sup> WM.**

Pooled analysis of patients with *MYD88*<sup>MUT</sup> including 98 treated with zanubrutinib and 92 treated with ibrutinib. PFS was plotted based on the VAF status of *CXCR4* (A), *TP53* (B), and *TERT* (C). Worse PFS was seen in patients harboring these mutations with VAF≥1%. DEL, deletion; MUT, mutated; PFS, progression-free survival; VAF, variant allele frequency; WM, Waldenström macroglobulinemia; WT, wild-type.

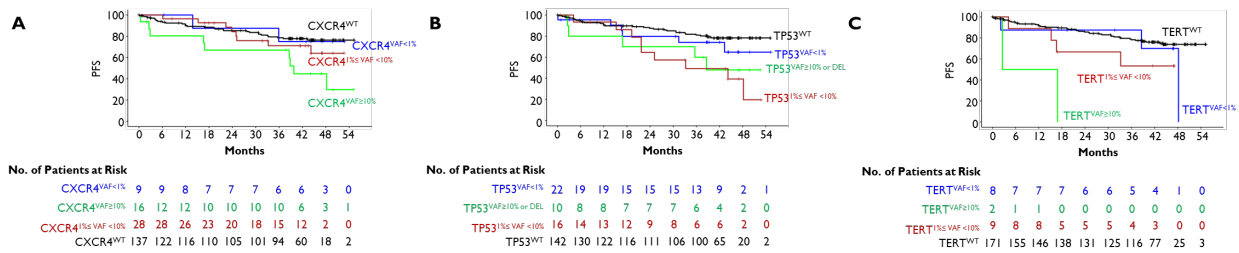

**Supplemental Figure 2. PFS by *CXCR4* mutational status and by treatment in patients with *MYD88*<sup>MUT</sup> WM.**

PFS comparison by *CXCR4* mutational status (WT, NS, FS) in patients treated by zanubrutinib or ibrutinib. A Cox regression model with treatment group, *TERT* (WT, MUT), and *TP53* (WT, MUT) mutational status as covariates was used to compare PFS between zanubrutinib and ibrutinib in patients with *CXCR4*<sup>NS</sup>, *CXCR4*<sup>FS</sup>, and *CXCR4*<sup>WT</sup>. FS, frameshift; HR, hazard ratio; MUT, mutated; NS, nonsense; PFS, progression-free survival; WM, Waldenström macroglobulinemia; WT, wild-type.

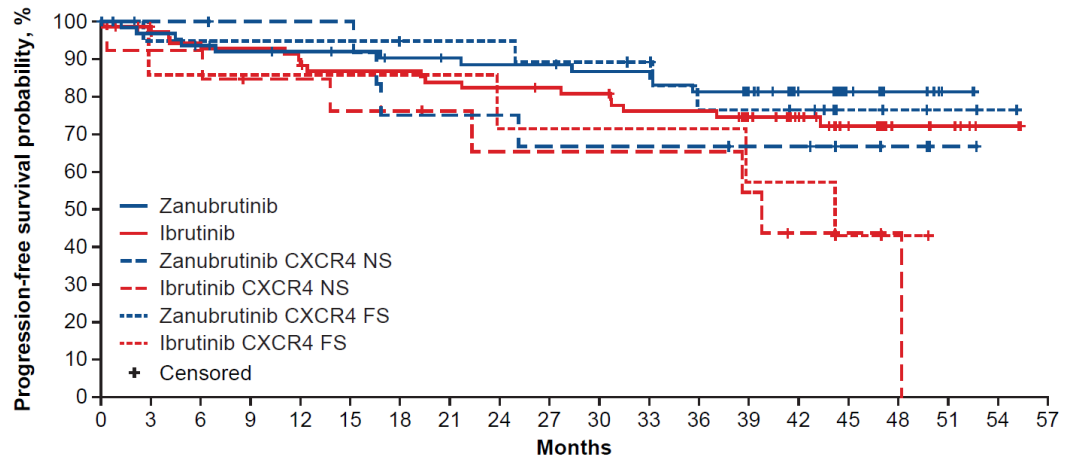

| No. of Patients at Risk |                    | 0  | 3  | 6  | 9  | 12 | 15 | 18 | 21 | 24 | 27 | 30 | 33 | 36 | 39 | 42 | 45 | 48 | 51 | 54 | 57 |    |    |    |    |    |    |    |    |    |    |    |    |    |    |    |   |   |   |   |
|-------------------------|--------------------|----|----|----|----|----|----|----|----|----|----|----|----|----|----|----|----|----|----|----|----|----|----|----|----|----|----|----|----|----|----|----|----|----|----|----|---|---|---|---|
| Zanubrutinib            | Ibrutinib          | 65 | 61 | 58 | 56 | 55 | 54 | 52 | 51 | 50 | 50 | 48 | 48 | 45 | 38 | 26 | 15 | 9  | 5  | 0  | 72 | 68 | 64 | 63 | 61 | 58 | 58 | 56 | 55 | 54 | 53 | 49 | 49 | 40 | 34 | 23 | 9 | 6 | 2 | 0 |
| Zanubrutinib CXCR4 NS   | Ibrutinib CXCR4 NS | 14 | 13 | 13 | 12 | 12 | 12 | 9  | 9  | 9  | 8  | 8  | 8  | 8  | 7  | 7  | 5  | 3  | 1  | 0  | 13 | 12 | 12 | 10 | 10 | 9  | 8  | 7  | 6  | 6  | 6  | 6  | 6  | 5  | 3  | 2  | 1 | 0 |   |   |
| Zanubrutinib CXCR4 FS   | Ibrutinib CXCR4 FS | 19 | 18 | 18 | 18 | 18 | 18 | 17 | 17 | 17 | 16 | 16 | 15 | 12 | 12 | 10 | 5  | 3  | 2  | 1  | 0  | 7  | 6  | 6  | 6  | 6  | 6  | 6  | 6  | 5  | 5  | 5  | 5  | 5  | 4  | 4  | 2 | 1 | 0 |   |

|            | Zanubrutinib vs Ibrutinib in different subgroups |                            |                            |
|------------|--------------------------------------------------|----------------------------|----------------------------|
|            | <i>CXCR4</i> <sup>NS</sup>                       | <i>CXCR4</i> <sup>FS</sup> | <i>CXCR4</i> <sup>WT</sup> |
| HR (95%CI) | 0.30 (0.07, 1.22)                                | 0.21 (0.04, 1.16)          | 0.68 (0.32, 1.45)          |
| P-value    | 0.093                                            | 0.074                      | 0.322                      |

**Supplemental Figure 3. PFS by *TP53* alteration and by treatment in patients with *MYD88*<sup>MUT</sup> WM.**

*MYD88*<sup>MUT</sup> WM patients treated with ibrutinib or zanubrutinib were separately classified into different subgroups based on *TP53* VAF and deletion status. The PFS Kaplan-Meier curves were compared A) between patients with *TP53*<sup>WT</sup> and patients with *TP53*<sup>MUT</sup>, B) between patients with *TP53*<sup>WT</sup>, *TP53*<sup>VAF<1%</sup>, and *TP53*<sup>VAF≥1% or deletion</sup>, and C) in patients with *TP53*<sup>WT or VAF<1%</sup> and *TP53*<sup>VAF≥1% or deletion</sup>. Patients with *TP53*<sup>VAF≥1% or deletion</sup> had worse PFS compared to patients with *TP53*<sup>WT or VAF<1%</sup> independent of treatment. Zanubrutinib showed more favorable PFS than ibrutinib regardless of *TP53* alteration status. HR<sup>1</sup> and *P*-values<sup>1</sup> were estimated using a Cox regression model with *CXCR4* (WT, MUT), *TP53* (WT or VAF <1% vs VAF ≥1% or deletion), and *TERT* (WT, MUT) mutational status as covariates. In addition, a Cox regression model with treatment group, *CXCR4* (WT, MUT), and *TERT* (WT, MUT) mutational status as covariates was used to compare PFS between zanubrutinib and ibrutinib in patients with *TP53*<sup>WT or VAF<1%</sup> and *TP53*<sup>VAF≥1% or deletion</sup>. The HR<sup>2</sup> and *P*-value<sup>2</sup> are shown. MUT, mutated; VAF, variant allele frequency; WM, Waldenström macroglobulinemia; WT, wild-type.

A)

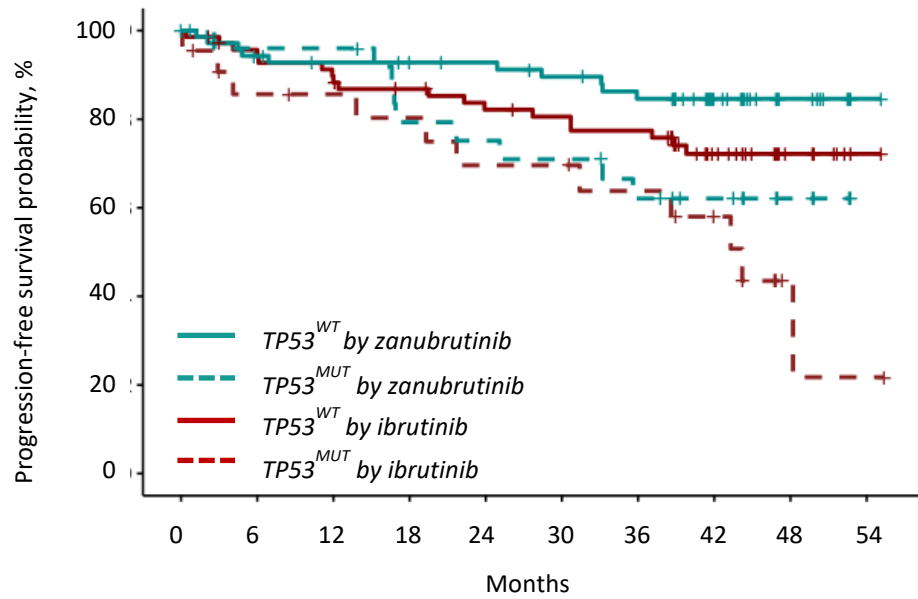

**No. of Patients at Risk**

|                              |    |    |    |    |    |    |    |    |    |   |
|------------------------------|----|----|----|----|----|----|----|----|----|---|
| $TP53^{WT}$ by zanubrutinib  | 72 | 65 | 61 | 60 | 58 | 55 | 51 | 34 | 11 | 1 |
| $TP53^{MUT}$ by zanubrutinib | 26 | 24 | 24 | 19 | 18 | 17 | 14 | 10 | 4  | 0 |
| $TP53^{WT}$ by ibrutinib     | 70 | 65 | 61 | 57 | 53 | 51 | 49 | 32 | 9  | 1 |
| $TP53^{MUT}$ by ibrutinib    | 22 | 17 | 16 | 15 | 13 | 13 | 11 | 9  | 2  | 1 |

B)

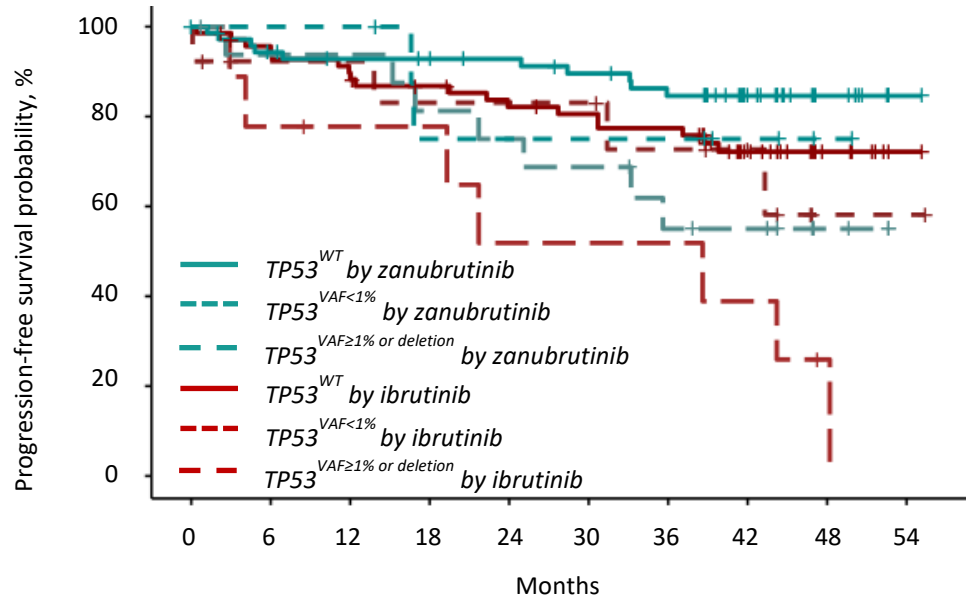

**No. of Patients at Risk**

|                                                          | 0  | 6  | 12 | 18 | 24 | 30 | 36 | 42 | 48 | 54 |
|----------------------------------------------------------|----|----|----|----|----|----|----|----|----|----|
| $TP53^{WT}$ by zanubrutinib                              | 72 | 65 | 61 | 60 | 58 | 55 | 51 | 34 | 11 | 1  |
| $TP53^{VAF<1\%}$ by zanubrutinib                         | 9  | 9  | 9  | 6  | 6  | 6  | 6  | 3  | 1  | 0  |
| $TP53^{VAF\geq 1\% \text{ or deletion}}$ by zanubrutinib | 17 | 15 | 15 | 13 | 12 | 11 | 8  | 7  | 3  | 0  |
| $TP53^{WT}$ by ibrutinib                                 | 70 | 65 | 61 | 57 | 53 | 51 | 49 | 32 | 9  | 1  |
| $TP53^{VAF<1\%}$ by ibrutinib                            | 13 | 10 | 10 | 9  | 9  | 9  | 7  | 6  | 1  | 1  |
| $TP53^{VAF\geq 1\% \text{ or deletion}}$ by ibrutinib    | 9  | 7  | 6  | 6  | 4  | 4  | 4  | 3  | 1  | 0  |



C)

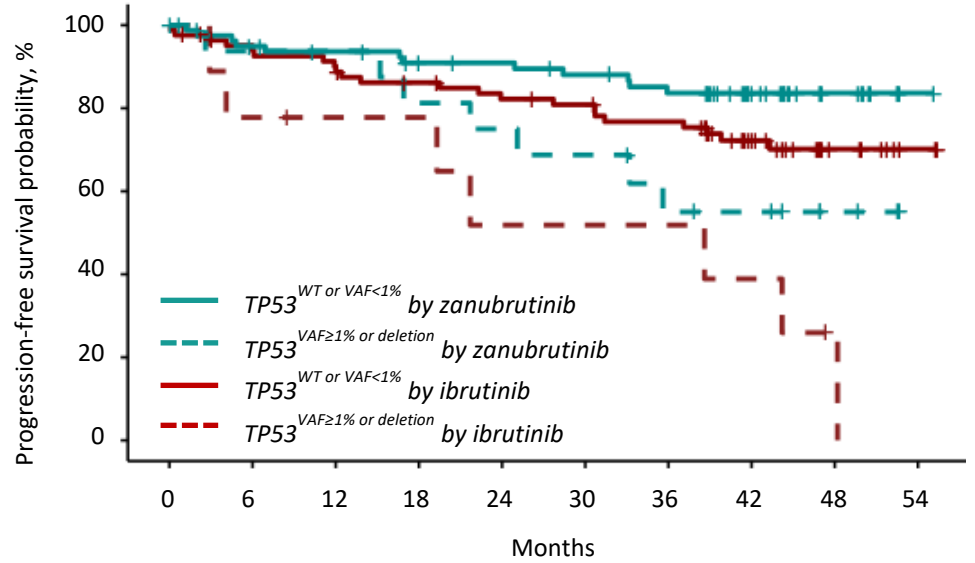

**No. of Patients at Risk**

|                                                            |    |    |    |    |    |    |    |    |    |   |
|------------------------------------------------------------|----|----|----|----|----|----|----|----|----|---|
| $TP53^{WT \text{ or } VAF < 1\%}$ by zanubrutinib          | 81 | 74 | 70 | 66 | 64 | 61 | 57 | 37 | 12 | 1 |
| $TP53^{VAF \geq 1\% \text{ or } deletion}$ by zanubrutinib | 17 | 15 | 15 | 13 | 12 | 11 | 8  | 7  | 3  | 0 |
| $TP53^{WT \text{ or } VAF < 1\%}$ by ibrutinib             | 83 | 75 | 71 | 66 | 62 | 60 | 56 | 38 | 10 | 2 |
| $TP53^{VAF \geq 1\% \text{ or } deletion}$ by ibrutinib    | 9  | 7  | 6  | 6  | 4  | 4  | 4  | 3  | 1  | 0 |

|                          | $TP53^{VAF \geq 1\% \text{ or } deletion}$ vs $TP53^{WT \text{ or } VAF < 1\%}$ in different treatment arms |                                                              | Zanubrutinib vs ibrutinib in different subgroups |                                           |                                                   |
|--------------------------|-------------------------------------------------------------------------------------------------------------|--------------------------------------------------------------|--------------------------------------------------|-------------------------------------------|---------------------------------------------------|
|                          | Patients with $MYD88^{MUT}$ treated with ibrutinib (n=92)                                                   | Patients with $MYD88^{MUT}$ treated with zanubrutinib (n=98) |                                                  | $TP53^{WT \text{ or } VAF < 1\%}$ (n=164) | $TP53^{VAF \geq 1\% \text{ or } deletion}$ (n=26) |
| HR (95% CI) <sup>1</sup> | 3.792 (1.422, 10.114)                                                                                       | 2.239 (0.767, 6.534)                                         | HR (95% CI) <sup>2</sup>                         | 0.515 (0.251, 1.056)                      | 0.491 (0.158, 1.529)                              |
| P-value <sup>1</sup>     | 0.008                                                                                                       | 0.140                                                        | P-value <sup>2</sup>                             | 0.070                                     | 0.220                                             |

**Supplemental Figure 4. PFS by *TP53* mutation status in patients with *MYD88*<sup>WT</sup> WM treated by zanubrutinib.**

Patients with *MYD88*<sup>WT</sup> and *TP53*<sup>MUT</sup> have less favorable PFS than *TP53*<sup>WT</sup> patients. HR, hazard ratio; MUT, mutated; PFS, progression-free survival; WM, Waldenström macroglobulinemia; WT, wild-type.

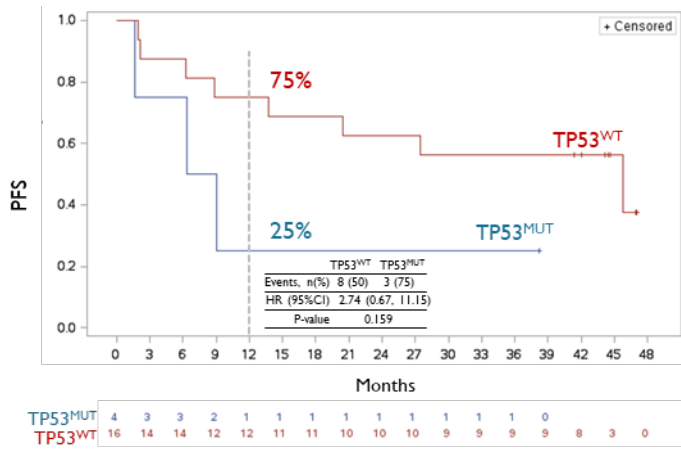

Supplement: BLOODA_ADV-2023-010906-mmc1.pdf [file BLOODA_ADV-2023-010906-mmc1.pdf]
